# Supplementary material for: Multimodal Data Fusion Reveals Morpho-Genetic Variations in Human Cortical Neurons Associated with Tumor Infiltration
Source: bioRxiv preprint, doi:10.64898/2025.12.26.696632, version 2 (2026-01-05)
Supplement: Supplementary Table 2 [file 696632_file03.xlsx]

## Sheet: Sheet1
PTRSB	cell_id	brain_region	patient_number	tissue_block_number	slice_thickness	dye_name	immunohistochemistry
P00001-T001-R000-S001	2	MFG	P00001	T001	300	Lucifer Yellow	0
P00001-T001-R000-S001	5	MFG	P00001	T001	300	Lucifer Yellow	0
P00001-T001-R000-S001	6	MFG	P00001	T001	300	Lucifer Yellow	0
P00001-T001-R000-S001	7	MFG	P00001	T001	300	Lucifer Yellow	0
P00001-T001-R000-S001	8	MFG	P00001	T001	300	Lucifer Yellow	0
P00001-T001-R000-S001	10	MFG	P00001	T001	300	Lucifer Yellow	0
P00001-T001-R000-S002	14	MFG	P00001	T001	300	Lucifer Yellow	0
P00001-T001-R000-S002	15	MFG	P00001	T001	300	Lucifer Yellow	0
P00001-T001-R000-S002	19	MFG	P00001	T001	300	Lucifer Yellow	0
P00001-T001-R000-S001	20	MFG	P00001	T001	300	Lucifer Yellow	0
P00001-T001-R000-S001	27	MFG	P00001	T001	300	Lucifer Yellow	0
P00001-T001-R000-S002	33	MFG	P00001	T001	300	Lucifer Yellow	0
P00001-T001-R000-S002	36	MFG	P00001	T001	300	Lucifer Yellow	0
P00001-T001-R000-S002	40	MFG	P00001	T001	300	Lucifer Yellow	0
P00001-T001-R000-S002	43	MFG	P00001	T001	300	Lucifer Yellow	0
P00001-T001-R000-S002	44	MFG	P00001	T001	300	Lucifer Yellow	0
P00001-T001-R000-S002	45	MFG	P00001	T001	300	Lucifer Yellow	0
P00001-T001-R000-S002	46	MFG	P00001	T001	300	Lucifer Yellow	0
P00001-T001-R000-S002	47	MFG	P00001	T001	300	Lucifer Yellow	0
P00001-T001-R000-S002	48	MFG	P00001	T001	300	Lucifer Yellow	0
P00002-T001-R000-S001	50	SFG	P00002	T001	100	Lucifer Yellow	0
P00002-T001-R000-S001	52	SFG	P00002	T001	100	Lucifer Yellow	0
P00002-T001-R000-S001	53	SFG	P00002	T001	100	Lucifer Yellow	0
P00002-T001-R000-S001	59	SFG	P00002	T001	100	Lucifer Yellow	0
P00002-T001-R000-S001	61	SFG	P00002	T001	100	Lucifer Yellow	0
P00002-T001-R000-S001	63	SFG	P00002	T001	100	Lucifer Yellow	0
P00002-T001-R000-S001	64	SFG	P00002	T001	100	Lucifer Yellow	0
P00002-T001-R000-S001	65	SFG	P00002	T001	100	Lucifer Yellow	0
P00002-T001-R000-S001	66	SFG	P00002	T001	100	Lucifer Yellow	0
P00003-T001-R000-S000	67	IPL-near-AG	P00003	T001	300	Lucifer Yellow	0
P00003-T001-R000-S000	68	IPL-near-AG	P00003	T001	300	Lucifer Yellow	0
P00003-T001-R000-S000	69	IPL-near-AG	P00003	T001	300	Lucifer Yellow	0
P00003-T002-R000-S001	70	IPL-near-AG	P00003	T002	100	Lucifer Yellow	0
P00003-T002-R000-S001	71	IPL-near-AG	P00003	T002	100	Lucifer Yellow	0
P00003-T002-R000-S001	72	IPL-near-AG	P00003	T002	100	Lucifer Yellow	0
P00003-T002-R000-S001	73	IPL-near-AG	P00003	T002	100	Lucifer Yellow	0
P00003-T002-R000-S002	76	IPL-near-AG	P00003	T002	100	Lucifer Yellow	0
P00003-T002-R000-S002	77	IPL-near-AG	P00003	T002	100	Lucifer Yellow	0
P00003-T002-R000-S003	81	IPL-near-AG	P00003	T002	100	Lucifer Yellow	0
P00003-T002-R000-S003	82	IPL-near-AG	P00003	T002	100	Lucifer Yellow	0
P00003-T002-R000-S003	83	IPL-near-AG	P00003	T002	100	Lucifer Yellow	0
P00003-T002-R000-S003	84	IPL-near-AG	P00003	T002	100	Lucifer Yellow	0
P00003-T002-R000-S003	85	IPL-near-AG	P00003	T002	100	Lucifer Yellow	0
P00003-T002-R000-S003	86	IPL-near-AG	P00003	T002	100	Lucifer Yellow	0
P00003-T002-R000-S003	88	IPL-near-AG	P00003	T002	100	Lucifer Yellow	0
P00003-T002-R000-S003	90	IPL-near-AG	P00003	T002	100	Lucifer Yellow	0
P00003-T002-R000-S003	91	IPL-near-AG	P00003	T002	100	Lucifer Yellow	0
P00003-T001-R000-S006	93	IPL-near-AG	P00003	T001	300	Lucifer Yellow	0
P00003-T001-R000-S006	94	IPL-near-AG	P00003	T001	300	Lucifer Yellow	0
P00003-T001-R000-S006	96	IPL-near-AG	P00003	T001	300	Lucifer Yellow	0
P00003-T001-R000-S006	97	IPL-near-AG	P00003	T001	300	Lucifer Yellow	0
P00003-T001-R000-S006	98	IPL-near-AG	P00003	T001	300	Lucifer Yellow	0
P00003-T001-R000-S006	99	IPL-near-AG	P00003	T001	300	Lucifer Yellow	0
P00003-T001-R000-S006	100	IPL-near-AG	P00003	T001	300	Lucifer Yellow	0
P00003-T001-R000-S006	102	IPL-near-AG	P00003	T001	300	Lucifer Yellow	0
P00003-T001-R000-S006	103	IPL-near-AG	P00003	T001	300	Lucifer Yellow	0
P00003-T001-R000-S006	104	IPL-near-AG	P00003	T001	300	Lucifer Yellow	0
P00003-T001-R000-S006	106	IPL-near-AG	P00003	T001	300	Lucifer Yellow	0
P00003-T001-R000-S006	108	IPL-near-AG	P00003	T001	300	Lucifer Yellow	0
P00003-T001-R000-S006	109	IPL-near-AG	P00003	T001	300	Lucifer Yellow	0
P00003-T001-R000-S002	110	IPL-near-AG	P00003	T001	300	Lucifer Yellow	0
P00003-T001-R000-S002	111	IPL-near-AG	P00003	T001	300	Lucifer Yellow	0
P00003-T001-R000-S001	114	IPL-near-AG	P00003	T001	300	Lucifer Yellow	0
P00003-T001-R000-S001	115	IPL-near-AG	P00003	T001	300	Lucifer Yellow	0
P00003-T001-R000-S001	117	IPL-near-AG	P00003	T001	300	Lucifer Yellow	0
P00003-T001-R000-S001	119	IPL-near-AG	P00003	T001	300	Lucifer Yellow	0
P00003-T001-R000-S001	121	IPL-near-AG	P00003	T001	300	Lucifer Yellow	0
P00003-T001-R000-S001	122	IPL-near-AG	P00003	T001	300	Lucifer Yellow	0
P00003-T001-R000-S001	123	IPL-near-AG	P00003	T001	300	Lucifer Yellow	0
P00003-T001-R000-S001	125	IPL-near-AG	P00003	T001	300	Lucifer Yellow	0
P00003-T001-R000-S001	126	IPL-near-AG	P00003	T001	300	Lucifer Yellow	0
P00003-T001-R000-S001	129	IPL-near-AG	P00003	T001	300	Lucifer Yellow	0
P00003-T001-R000-S001	130	IPL-near-AG	P00003	T001	300	Lucifer Yellow	0
P00003-T001-R000-S001	131	IPL-near-AG	P00003	T001	300	Lucifer Yellow	0
P00003-T001-R000-S001	133	IPL-near-AG	P00003	T001	300	Lucifer Yellow	0
P00003-T001-R000-S001	134	IPL-near-AG	P00003	T001	300	Lucifer Yellow	0
P00003-T001-R000-S001	135	IPL-near-AG	P00003	T001	300	Lucifer Yellow	0
P00003-T001-R000-S001	136	IPL-near-AG	P00003	T001	300	Lucifer Yellow	0
P00003-T001-R000-S001	137	IPL-near-AG	P00003	T001	300	Lucifer Yellow	0
P00003-T001-R000-S001	138	IPL-near-AG	P00003	T001	300	Lucifer Yellow	0
P00003-T001-R000-S001	141	IPL-near-AG	P00003	T001	300	Lucifer Yellow	0
P00003-T001-R000-S001	142	IPL-near-AG	P00003	T001	300	Lucifer Yellow	0
P00003-T001-R000-S001	144	IPL-near-AG	P00003	T001	300	Lucifer Yellow	0
P00003-T001-R000-S001	145	IPL-near-AG	P00003	T001	300	Lucifer Yellow	0
P00003-T001-R000-S001	146	IPL-near-AG	P00003	T001	300	Lucifer Yellow	0
P00003-T001-R000-S001	147	IPL-near-AG	P00003	T001	300	Lucifer Yellow	0
P00003-T001-R000-S001	148	IPL-near-AG	P00003	T001	300	Lucifer Yellow	0
P00003-T001-R000-S001	149	IPL-near-AG	P00003	T001	300	Lucifer Yellow	0
P00003-T001-R000-S001	150	IPL-near-AG	P00003	T001	300	Lucifer Yellow	0
P00003-T001-R000-S001	151	IPL-near-AG	P00003	T001	300	Lucifer Yellow	0
P00003-T001-R000-S001	152	IPL-near-AG	P00003	T001	300	Lucifer Yellow	0
P00003-T001-R000-S001	153	IPL-near-AG	P00003	T001	300	Lucifer Yellow	0
P00003-T001-R000-S001	154	IPL-near-AG	P00003	T001	300	Lucifer Yellow	0
P00003-T001-R000-S001	155	IPL-near-AG	P00003	T001	300	Lucifer Yellow	0
P00003-T001-R000-S005	156	IPL-near-AG	P00003	T001	300	Lucifer Yellow	0
P00003-T001-R000-S005	163	IPL-near-AG	P00003	T001	300	Lucifer Yellow	0
P00003-T001-R000-S005	164	IPL-near-AG	P00003	T001	300	Lucifer Yellow	0
P00003-T001-R000-S005	166	IPL-near-AG	P00003	T001	300	Lucifer Yellow	0
P00003-T001-R000-S005	167	IPL-near-AG	P00003	T001	300	Lucifer Yellow	0
P00003-T001-R000-S005	168	IPL-near-AG	P00003	T001	300	Lucifer Yellow	0
P00003-T001-R000-S005	172	IPL-near-AG	P00003	T001	300	Lucifer Yellow	0
P00010-T001-R000-S012	174	TP	P00010	T001	200	Lucifer Yellow	0
P00003-T001-R000-S003	175	IPL-near-AG	P00003	T001	300	Lucifer Yellow	0
P00003-T001-R000-S003	176	IPL-near-AG	P00003	T001	300	Lucifer Yellow	0
P00003-T001-R000-S003	178	IPL-near-AG	P00003	T001	300	Lucifer Yellow	0
P00003-T001-R000-S003	181	IPL-near-AG	P00003	T001	300	Lucifer Yellow	0
P00003-T001-R000-S003	183	IPL-near-AG	P00003	T001	300	Lucifer Yellow	0
P00003-T001-R000-S003	184	IPL-near-AG	P00003	T001	300	Lucifer Yellow	0
P00003-T001-R000-S003	185	IPL-near-AG	P00003	T001	300	Lucifer Yellow	0
P00003-T001-R000-S003	187	IPL-near-AG	P00003	T001	300	Lucifer Yellow	0
P00003-T001-R000-S003	189	IPL-near-AG	P00003	T001	300	Lucifer Yellow	0
P00003-T001-R000-S003	190	IPL-near-AG	P00003	T001	300	Lucifer Yellow	0
P00003-T001-R000-S003	191	IPL-near-AG	P00003	T001	300	Lucifer Yellow	0
P00003-T001-R000-S003	192	IPL-near-AG	P00003	T001	300	Lucifer Yellow	0
P00003-T001-R000-S003	193	IPL-near-AG	P00003	T001	300	Lucifer Yellow	0
P00003-T001-R000-S003	194	IPL-near-AG	P00003	T001	300	Lucifer Yellow	0
P00003-T001-R000-S003	195	IPL-near-AG	P00003	T001	300	Lucifer Yellow	0
P00003-T001-R000-S003	198	IPL-near-AG	P00003	T001	300	Lucifer Yellow	0
P00003-T001-R000-S003	199	IPL-near-AG	P00003	T001	300	Lucifer Yellow	0
P00003-T001-R000-S004	202	IPL-near-AG	P00003	T001	300	Lucifer Yellow	0
P00003-T001-R000-S004	203	IPL-near-AG	P00003	T001	300	Lucifer Yellow	0
P00003-T001-R000-S004	204	IPL-near-AG	P00003	T001	300	Lucifer Yellow	0
P00003-T001-R000-S004	205	IPL-near-AG	P00003	T001	300	Lucifer Yellow	0
P00003-T001-R000-S004	206	IPL-near-AG	P00003	T001	300	Lucifer Yellow	0
P00003-T001-R000-S004	207	IPL-near-AG	P00003	T001	300	Lucifer Yellow	0
P00003-T001-R000-S004	208	IPL-near-AG	P00003	T001	300	Lucifer Yellow	0
P00003-T001-R000-S004	209	IPL-near-AG	P00003	T001	300	Lucifer Yellow	0
P00003-T001-R000-S004	210	IPL-near-AG	P00003	T001	300	Lucifer Yellow	0
P00003-T001-R000-S004	211	IPL-near-AG	P00003	T001	300	Lucifer Yellow	0
P00003-T001-R000-S004	212	IPL-near-AG	P00003	T001	300	Lucifer Yellow	0
P00003-T001-R000-S004	213	IPL-near-AG	P00003	T001	300	Lucifer Yellow	0
P00003-T001-R000-S004	214	IPL-near-AG	P00003	T001	300	Lucifer Yellow	0
P00003-T001-R000-S004	215	IPL-near-AG	P00003	T001	300	Lucifer Yellow	0
P00003-T001-R000-S004	216	IPL-near-AG	P00003	T001	300	Lucifer Yellow	0
P00003-T001-R000-S004	217	IPL-near-AG	P00003	T001	300	Lucifer Yellow	0
P00003-T001-R000-S004	218	IPL-near-AG	P00003	T001	300	Lucifer Yellow	0
P00003-T001-R000-S004	219	IPL-near-AG	P00003	T001	300	Lucifer Yellow	0
P00003-T001-R000-S004	220	IPL-near-AG	P00003	T001	300	Lucifer Yellow	0
P00003-T001-R000-S004	221	IPL-near-AG	P00003	T001	300	Lucifer Yellow	0
P00003-T001-R000-S004	222	IPL-near-AG	P00003	T001	300	Lucifer Yellow	0
P00003-T001-R000-S004	223	IPL-near-AG	P00003	T001	300	Lucifer Yellow	0
P00003-T001-R000-S004	224	IPL-near-AG	P00003	T001	300	Lucifer Yellow	0
P00003-T001-R000-S004	225	IPL-near-AG	P00003	T001	300	Lucifer Yellow	0
P00003-T001-R000-S004	226	IPL-near-AG	P00003	T001	300	Lucifer Yellow	0
P00003-T001-R000-S004	227	IPL-near-AG	P00003	T001	300	Lucifer Yellow	0
P00003-T001-R000-S004	228	IPL-near-AG	P00003	T001	300	Lucifer Yellow	0
P00003-T001-R000-S004	229	IPL-near-AG	P00003	T001	300	Lucifer Yellow	0
P00003-T001-R000-S004	230	IPL-near-AG	P00003	T001	300	Lucifer Yellow	0
P00003-T001-R000-S004	231	IPL-near-AG	P00003	T001	300	Lucifer Yellow	0
P00003-T001-R000-S004	232	IPL-near-AG	P00003	T001	300	Lucifer Yellow	0
P00003-T001-R000-S004	233	IPL-near-AG	P00003	T001	300	Lucifer Yellow	0
P00003-T001-R000-S004	235	IPL-near-AG	P00003	T001	300	Lucifer Yellow	0
P00003-T001-R000-S004	236	IPL-near-AG	P00003	T001	300	Lucifer Yellow	0
P00003-T001-R000-S004	237	IPL-near-AG	P00003	T001	300	Lucifer Yellow	0
P00003-T001-R000-S004	238	IPL-near-AG	P00003	T001	300	Lucifer Yellow	0
P00003-T001-R000-S004	239	IPL-near-AG	P00003	T001	300	Lucifer Yellow	0
P00003-T001-R000-S004	240	IPL-near-AG	P00003	T001	300	Lucifer Yellow	0
P00003-T001-R000-S004	241	IPL-near-AG	P00003	T001	300	Lucifer Yellow	0
P00003-T001-R000-S004	242	IPL-near-AG	P00003	T001	300	Lucifer Yellow	0
P00003-T001-R000-S004	245	IPL-near-AG	P00003	T001	300	Lucifer Yellow	0
P00003-T001-R000-S004	246	IPL-near-AG	P00003	T001	300	Lucifer Yellow	0
P00003-T001-R000-S007	247	IPL-near-AG	P00003	T001	300	Lucifer Yellow	0
P00003-T001-R000-S007	248	IPL-near-AG	P00003	T001	300	Lucifer Yellow	0
P00003-T001-R000-S007	249	IPL-near-AG	P00003	T001	300	Lucifer Yellow	0
P00003-T001-R000-S007	250	IPL-near-AG	P00003	T001	300	Lucifer Yellow	0
P00003-T001-R000-S007	251	IPL-near-AG	P00003	T001	300	Lucifer Yellow	0
P00003-T001-R000-S007	252	IPL-near-AG	P00003	T001	300	Lucifer Yellow	0
P00003-T001-R000-S007	253	IPL-near-AG	P00003	T001	300	Lucifer Yellow	0
P00003-T001-R000-S007	254	IPL-near-AG	P00003	T001	300	Lucifer Yellow	0
P00003-T001-R000-S007	255	IPL-near-AG	P00003	T001	300	Lucifer Yellow	0
P00003-T001-R000-S007	256	IPL-near-AG	P00003	T001	300	Lucifer Yellow	0
P00003-T001-R000-S007	257	IPL-near-AG	P00003	T001	300	Lucifer Yellow	0
P00003-T001-R000-S007	258	IPL-near-AG	P00003	T001	300	Lucifer Yellow	0
P00003-T001-R000-S007	261	IPL-near-AG	P00003	T001	300	Lucifer Yellow	0
P00003-T001-R000-S007	262	IPL-near-AG	P00003	T001	300	Lucifer Yellow	0
P00003-T001-R000-S007	263	IPL-near-AG	P00003	T001	300	Lucifer Yellow	0
P00003-T001-R000-S007	264	IPL-near-AG	P00003	T001	300	Lucifer Yellow	0
P00003-T001-R000-S007	265	IPL-near-AG	P00003	T001	300	Lucifer Yellow	0
P00003-T001-R000-S007	266	IPL-near-AG	P00003	T001	300	Lucifer Yellow	0
P00003-T001-R000-S007	267	IPL-near-AG	P00003	T001	300	Lucifer Yellow	0
P00003-T001-R000-S007	269	IPL-near-AG	P00003	T001	300	Lucifer Yellow	0
P00003-T001-R000-S007	270	IPL-near-AG	P00003	T001	300	Lucifer Yellow	0
P00003-T001-R000-S007	271	IPL-near-AG	P00003	T001	300	Lucifer Yellow	0
P00003-T001-R000-S007	272	IPL-near-AG	P00003	T001	300	Lucifer Yellow	0
P00003-T001-R000-S007	273	IPL-near-AG	P00003	T001	300	Lucifer Yellow	0
P00003-T001-R000-S007	274	IPL-near-AG	P00003	T001	300	Lucifer Yellow	0
P00003-T001-R000-S007	275	IPL-near-AG	P00003	T001	300	Lucifer Yellow	0
P00003-T001-R000-S007	276	IPL-near-AG	P00003	T001	300	Lucifer Yellow	0
P00003-T001-R000-S007	277	IPL-near-AG	P00003	T001	300	Lucifer Yellow	0
P00003-T001-R000-S007	278	IPL-near-AG	P00003	T001	300	Lucifer Yellow	0
P00003-T001-R000-S007	279	IPL-near-AG	P00003	T001	300	Lucifer Yellow	0
P00003-T001-R000-S007	280	IPL-near-AG	P00003	T001	300	Lucifer Yellow	0
P00003-T001-R000-S007	282	IPL-near-AG	P00003	T001	300	Lucifer Yellow	0
P00003-T002-R000-S001	283	IPL-near-AG	P00003	T002	200	Lucifer Yellow	0
P00003-T001-R000-S008	284	IPL-near-AG	P00003	T001	300	Lucifer Yellow	0
P00003-T001-R000-S008	285	IPL-near-AG	P00003	T001	300	Lucifer Yellow	0
P00003-T001-R000-S008	288	IPL-near-AG	P00003	T001	300	Lucifer Yellow	0
P00003-T001-R000-S008	289	IPL-near-AG	P00003	T001	300	Lucifer Yellow	0
P00003-T001-R000-S008	291	IPL-near-AG	P00003	T001	300	Lucifer Yellow	0
P00003-T001-R000-S008	292	IPL-near-AG	P00003	T001	300	Lucifer Yellow	0
P00004-T001-R000-S034	293	IFG	P00004	T001	200	Lucifer Yellow	0
P00004-T001-R000-S003	295	IFG	P00004	T001	100	Lucifer Yellow	0
P00005-T001-R000-S001	297	MFG	P00005	T001	200	Lucifer Yellow	0
P00005-T001-R000-S001	298	MFG	P00005	T001	200	Lucifer Yellow	0
P00005-T001-R000-S001	299	MFG	P00005	T001	200	Lucifer Yellow	0
P00005-T001-R000-S001	300	MFG	P00005	T001	200	Lucifer Yellow	0
P00005-T001-R000-S001	302	MFG	P00005	T001	200	Lucifer Yellow	0
P00005-T001-R000-S001	303	MFG	P00005	T001	200	Lucifer Yellow	0
P00005-T001-R000-S001	305	MFG	P00005	T001	200	Lucifer Yellow	0
P00005-T001-R000-S001	307	MFG	P00005	T001	200	Lucifer Yellow	0
P00005-T001-R000-S001	309	MFG	P00005	T001	200	Lucifer Yellow	0
P00005-T001-R000-S001	310	MFG	P00005	T001	200	Lucifer Yellow	0
P00005-T001-R000-S001	311	MFG	P00005	T001	200	Lucifer Yellow	0
P00005-T001-R000-S001	314	MFG	P00005	T001	200	Lucifer Yellow	0
P00005-T001-R000-S001	315	MFG	P00005	T001	200	Lucifer Yellow	0
P00005-T001-R000-S001	316	MFG	P00005	T001	200	Lucifer Yellow	0
P00005-T001-R000-S001	317	MFG	P00005	T001	200	Lucifer Yellow	0
P00005-T001-R000-S001	318	MFG	P00005	T001	200	Lucifer Yellow	0
P00005-T001-R000-S003	320	MFG	P00005	T001	200	Lucifer Yellow	0
P00005-T001-R000-S003	322	MFG	P00005	T001	200	Lucifer Yellow	0
P00005-T001-R000-S003	324	MFG	P00005	T001	200	Lucifer Yellow	0
P00005-T001-R000-S003	325	MFG	P00005	T001	200	Lucifer Yellow	0
P00005-T001-R000-S003	326	MFG	P00005	T001	200	Lucifer Yellow	0
P00005-T001-R000-S003	327	MFG	P00005	T001	200	Lucifer Yellow	0
P00005-T001-R000-S003	328	MFG	P00005	T001	200	Lucifer Yellow	0
P00005-T001-R000-S003	329	MFG	P00005	T001	200	Lucifer Yellow	0
P00005-T001-R000-S003	330	MFG	P00005	T001	200	Lucifer Yellow	0
P00005-T001-R000-S003	331	MFG	P00005	T001	200	Lucifer Yellow	0
P00005-T001-R000-S016	333	MFG	P00005	T001	300	Lucifer Yellow	0
P00005-T001-R000-S016	341	MFG	P00005	T001	300	Lucifer Yellow	0
P00005-T001-R000-S016	343	MFG	P00005	T001	300	Lucifer Yellow	0
P00005-T001-R000-S016	344	MFG	P00005	T001	300	Lucifer Yellow	0
P00005-T001-R000-S016	345	MFG	P00005	T001	300	Lucifer Yellow	0
P00005-T001-R000-S016	348	MFG	P00005	T001	300	Lucifer Yellow	0
P00005-T001-R000-S016	349	MFG	P00005	T001	300	Lucifer Yellow	0
P00005-T001-R000-S016	352	MFG	P00005	T001	300	Lucifer Yellow	0
P00005-T001-R000-S009	356	MFG	P00005	T001	200	Lucifer Yellow	0
P00005-T001-R000-S009	361	MFG	P00005	T001	200	Lucifer Yellow	0
P00005-T001-R000-S009	362	MFG	P00005	T001	200	Lucifer Yellow	0
P00005-T001-R000-S009	365	MFG	P00005	T001	200	Lucifer Yellow	0
P00005-T001-R000-S009	366	MFG	P00005	T001	200	Lucifer Yellow	0
P00005-T001-R000-S009	368	MFG	P00005	T001	200	Lucifer Yellow	0
P00005-T001-R000-S009	370	MFG	P00005	T001	200	Lucifer Yellow	0
P00005-T001-R000-S009	371	MFG	P00005	T001	200	Lucifer Yellow	0
P00005-T001-R000-S009	372	MFG	P00005	T001	200	Lucifer Yellow	0
P00005-T001-R000-S009	373	MFG	P00005	T001	200	Lucifer Yellow	0
P00005-T001-R000-S005	374	MFG	P00005	T001	200	Lucifer Yellow	0
P00005-T001-R000-S005	375	MFG	P00005	T001	200	Lucifer Yellow	0
P00005-T001-R000-S005	376	MFG	P00005	T001	200	Lucifer Yellow	0
P00005-T001-R000-S005	377	MFG	P00005	T001	200	Lucifer Yellow	0
P00005-T001-R000-S005	378	MFG	P00005	T001	200	Lucifer Yellow	0
P00005-T001-R000-S005	379	MFG	P00005	T001	200	Lucifer Yellow	0
P00005-T001-R000-S005	380	MFG	P00005	T001	200	Lucifer Yellow	0
P00005-T001-R000-S005	381	MFG	P00005	T001	200	Lucifer Yellow	0
P00005-T001-R000-S005	382	MFG	P00005	T001	200	Lucifer Yellow	0
P00005-T001-R000-S005	383	MFG	P00005	T001	200	Lucifer Yellow	0
P00005-T001-R000-S005	384	MFG	P00005	T001	200	Lucifer Yellow	0
P00005-T001-R000-S005	385	MFG	P00005	T001	200	Lucifer Yellow	0
P00005-T001-R000-S005	387	MFG	P00005	T001	200	Lucifer Yellow	0
P00005-T001-R000-S005	390	MFG	P00005	T001	200	Lucifer Yellow	0
P00005-T001-R000-S005	391	MFG	P00005	T001	200	Lucifer Yellow	0
P00005-T001-R000-S005	392	MFG	P00005	T001	200	Lucifer Yellow	0
P00005-T001-R000-S005	393	MFG	P00005	T001	200	Lucifer Yellow	0
P00005-T001-R000-S005	394	MFG	P00005	T001	200	Lucifer Yellow	0
P00005-T001-R000-S005	396	MFG	P00005	T001	200	Lucifer Yellow	0
P00005-T001-R000-S005	397	MFG	P00005	T001	200	Lucifer Yellow	0
P00005-T001-R000-S005	398	MFG	P00005	T001	200	Lucifer Yellow	0
P00005-T001-R000-S005	399	MFG	P00005	T001	200	Lucifer Yellow	0
P00005-T001-R000-S005	400	MFG	P00005	T001	200	Lucifer Yellow	0
P00005-T001-R000-S004	401	MFG	P00005	T001	200	Lucifer Yellow	0
P00005-T001-R000-S004	403	MFG	P00005	T001	200	Lucifer Yellow	0
P00005-T001-R000-S004	404	MFG	P00005	T001	200	Lucifer Yellow	0
P00005-T001-R000-S004	405	MFG	P00005	T001	200	Lucifer Yellow	0
P00005-T001-R000-S004	406	MFG	P00005	T001	200	Lucifer Yellow	0
P00005-T001-R000-S004	407	MFG	P00005	T001	200	Lucifer Yellow	0
P00005-T001-R000-S004	409	MFG	P00005	T001	200	Lucifer Yellow	0
P00005-T001-R000-S004	410	MFG	P00005	T001	200	Lucifer Yellow	0
P00005-T001-R000-S004	411	MFG	P00005	T001	200	Lucifer Yellow	0
P00005-T001-R000-S004	412	MFG	P00005	T001	200	Lucifer Yellow	0
P00005-T001-R000-S004	413	MFG	P00005	T001	200	Lucifer Yellow	0
P00005-T001-R000-S004	414	MFG	P00005	T001	200	Lucifer Yellow	0
P00005-T001-R000-S004	415	MFG	P00005	T001	200	Lucifer Yellow	0
P00005-T001-R000-S004	416	MFG	P00005	T001	200	Lucifer Yellow	0
P00005-T001-R000-S004	417	MFG	P00005	T001	200	Lucifer Yellow	0
P00005-T001-R000-S004	419	MFG	P00005	T001	200	Lucifer Yellow	0
P00005-T001-R000-S004	422	MFG	P00005	T001	200	Lucifer Yellow	0
P00005-T001-R000-S004	424	MFG	P00005	T001	200	Lucifer Yellow	0
P00005-T001-R000-S004	425	MFG	P00005	T001	200	Lucifer Yellow	0
P00005-T001-R000-S004	427	MFG	P00005	T001	200	Lucifer Yellow	0
P00005-T001-R000-S004	428	MFG	P00005	T001	200	Lucifer Yellow	0
P00005-T001-R000-S004	429	MFG	P00005	T001	200	Lucifer Yellow	0
P00005-T001-R000-S004	431	MFG	P00005	T001	200	Lucifer Yellow	0
P00005-T001-R000-S004	432	MFG	P00005	T001	200	Lucifer Yellow	0
P00005-T001-R000-S004	433	MFG	P00005	T001	200	Lucifer Yellow	0
P00005-T001-R000-S004	434	MFG	P00005	T001	200	Lucifer Yellow	0
P00005-T001-R000-S006	435	MFG	P00005	T001	200	Lucifer Yellow	0
P00005-T001-R000-S006	437	MFG	P00005	T001	200	Lucifer Yellow	0
P00005-T001-R000-S006	438	MFG	P00005	T001	200	Lucifer Yellow	0
P00005-T001-R000-S006	439	MFG	P00005	T001	200	Lucifer Yellow	0
P00005-T001-R000-S006	440	MFG	P00005	T001	200	Lucifer Yellow	0
P00005-T001-R000-S006	441	MFG	P00005	T001	200	Lucifer Yellow	0
P00005-T001-R000-S006	442	MFG	P00005	T001	200	Lucifer Yellow	0
P00005-T001-R000-S006	443	MFG	P00005	T001	200	Lucifer Yellow	0
P00005-T001-R000-S006	444	MFG	P00005	T001	200	Lucifer Yellow	0
P00005-T001-R000-S005	445	MFG	P00005	T001	200	Lucifer Yellow	0
P00005-T001-R000-S005	447	MFG	P00005	T001	200	Lucifer Yellow	0
P00005-T001-R000-S005	448	MFG	P00005	T001	200	Lucifer Yellow	0
P00005-T001-R000-S005	450	MFG	P00005	T001	200	Lucifer Yellow	0
P00005-T001-R000-S005	455	MFG	P00005	T001	200	Lucifer Yellow	0
P00005-T001-R000-S005	458	MFG	P00005	T001	200	Lucifer Yellow	0
P00005-T001-R000-S005	459	MFG	P00005	T001	200	Lucifer Yellow	0
P00005-T001-R000-S005	461	MFG	P00005	T001	200	Lucifer Yellow	0
P00005-T001-R000-S005	462	MFG	P00005	T001	200	Lucifer Yellow	0
P00005-T001-R000-S005	463	MFG	P00005	T001	200	Lucifer Yellow	0
P00005-T001-R000-S005	464	MFG	P00005	T001	200	Lucifer Yellow	0
P00005-T001-R000-S005	466	MFG	P00005	T001	200	Lucifer Yellow	0
P00005-T001-R000-S005	467	MFG	P00005	T001	200	Lucifer Yellow	0
P00005-T001-R000-S005	468	MFG	P00005	T001	200	Lucifer Yellow	0
P00005-T001-R000-S005	470	MFG	P00005	T001	200	Lucifer Yellow	0
P00005-T001-R000-S005	471	MFG	P00005	T001	200	Lucifer Yellow	0
P00005-T001-R000-S005	472	MFG	P00005	T001	200	Lucifer Yellow	0
P00005-T001-R000-S005	475	MFG	P00005	T001	200	Lucifer Yellow	0
P00005-T001-R000-S005	478	MFG	P00005	T001	200	Lucifer Yellow	0
P00005-T001-R000-S006	479	MFG	P00005	T001	200	Lucifer Yellow	0
P00005-T001-R000-S006	480	MFG	P00005	T001	200	Lucifer Yellow	0
P00005-T001-R000-S006	481	MFG	P00005	T001	200	Lucifer Yellow	0
P00005-T001-R000-S006	482	MFG	P00005	T001	200	Lucifer Yellow	0
P00005-T001-R000-S006	483	MFG	P00005	T001	200	Lucifer Yellow	0
P00005-T001-R000-S006	484	MFG	P00005	T001	200	Lucifer Yellow	0
P00005-T001-R000-S006	485	MFG	P00005	T001	200	Lucifer Yellow	0
P00005-T001-R000-S006	486	MFG	P00005	T001	200	Lucifer Yellow	0
P00005-T001-R000-S006	487	MFG	P00005	T001	200	Lucifer Yellow	0
P00005-T001-R000-S006	488	MFG	P00005	T001	200	Lucifer Yellow	0
P00005-T001-R000-S006	489	MFG	P00005	T001	200	Lucifer Yellow	0
P00005-T001-R000-S006	490	MFG	P00005	T001	200	Lucifer Yellow	0
P00005-T001-R000-S006	492	MFG	P00005	T001	200	Lucifer Yellow	0
P00005-T001-R000-S006	494	MFG	P00005	T001	200	Lucifer Yellow	0
P00005-T001-R000-S006	495	MFG	P00005	T001	200	Lucifer Yellow	0
P00005-T001-R000-S006	496	MFG	P00005	T001	200	Lucifer Yellow	0
P00005-T001-R000-S006	497	MFG	P00005	T001	200	Lucifer Yellow	0
P00005-T001-R000-S006	498	MFG	P00005	T001	200	Lucifer Yellow	0
P00005-T001-R000-S006	499	MFG	P00005	T001	200	Lucifer Yellow	0
P00005-T001-R000-S006	502	MFG	P00005	T001	200	Lucifer Yellow	0
P00005-T001-R000-S006	503	MFG	P00005	T001	200	Lucifer Yellow	0
P00005-T001-R000-S006	504	MFG	P00005	T001	200	Lucifer Yellow	0
P00005-T001-R000-S006	506	MFG	P00005	T001	200	Lucifer Yellow	0
P00005-T001-R000-S006	507	MFG	P00005	T001	200	Lucifer Yellow	0
P00005-T001-R000-S006	508	MFG	P00005	T001	200	Lucifer Yellow	0
P00005-T001-R000-S006	509	MFG	P00005	T001	200	Lucifer Yellow	0
P00005-T001-R000-S006	511	MFG	P00005	T001	200	Lucifer Yellow	0
P00005-T001-R000-S007	512	MFG	P00005	T001	200	Lucifer Yellow	0
P00005-T001-R000-S007	513	MFG	P00005	T001	200	Lucifer Yellow	0
P00005-T001-R000-S007	514	MFG	P00005	T001	200	Lucifer Yellow	0
P00005-T001-R000-S007	515	MFG	P00005	T001	200	Lucifer Yellow	0
P00005-T001-R000-S007	516	MFG	P00005	T001	200	Lucifer Yellow	0
P00005-T001-R000-S007	517	MFG	P00005	T001	200	Lucifer Yellow	0
P00005-T001-R000-S007	518	MFG	P00005	T001	200	Lucifer Yellow	0
P00005-T001-R000-S007	519	MFG	P00005	T001	200	Lucifer Yellow	0
P00005-T001-R000-S007	520	MFG	P00005	T001	200	Lucifer Yellow	0
P00005-T001-R000-S007	521	MFG	P00005	T001	200	Lucifer Yellow	0
P00005-T001-R000-S007	523	MFG	P00005	T001	200	Lucifer Yellow	0
P00005-T001-R000-S007	524	MFG	P00005	T001	200	Lucifer Yellow	0
P00005-T001-R000-S007	525	MFG	P00005	T001	200	Lucifer Yellow	0
P00005-T001-R000-S007	526	MFG	P00005	T001	200	Lucifer Yellow	0
P00005-T001-R000-S007	527	MFG	P00005	T001	200	Lucifer Yellow	0
P00005-T001-R000-S007	528	MFG	P00005	T001	200	Lucifer Yellow	0
P00005-T001-R000-S007	529	MFG	P00005	T001	200	Lucifer Yellow	0
P00005-T001-R000-S007	531	MFG	P00005	T001	200	Lucifer Yellow	0
P00005-T001-R000-S007	532	MFG	P00005	T001	200	Lucifer Yellow	0
P00005-T001-R000-S007	533	MFG	P00005	T001	200	Lucifer Yellow	0
P00006-T001-R000-S002	534	STG	P00006	T001	200	Lucifer Yellow	0
P00006-T001-R000-S002	535	STG	P00006	T001	200	Lucifer Yellow	0
P00006-T001-R000-S002	536	STG	P00006	T001	200	Lucifer Yellow	0
P00006-T001-R000-S002	537	STG	P00006	T001	200	Lucifer Yellow	0
P00006-T001-R000-S002	539	STG	P00006	T001	200	Lucifer Yellow	0
P00006-T001-R000-S002	540	STG	P00006	T001	200	Lucifer Yellow	0
P00006-T001-R000-S002	541	STG	P00006	T001	200	Lucifer Yellow	0
P00006-T001-R000-S002	542	STG	P00006	T001	200	Lucifer Yellow	0
P00006-T001-R000-S002	543	STG	P00006	T001	200	Lucifer Yellow	0
P00006-T001-R000-S002	551	STG	P00006	T001	200	Lucifer Yellow	0
P00006-T001-R000-S002	552	STG	P00006	T001	200	Lucifer Yellow	0
P00006-T001-R000-S003	553	STG	P00006	T001	200	Lucifer Yellow	0
P00006-T001-R000-S003	554	STG	P00006	T001	200	Lucifer Yellow	0
P00006-T001-R000-S003	555	STG	P00006	T001	200	Lucifer Yellow	0
P00006-T001-R000-S003	556	STG	P00006	T001	200	Lucifer Yellow	0
P00006-T001-R000-S003	557	STG	P00006	T001	200	Lucifer Yellow	0
P00006-T001-R000-S003	558	STG	P00006	T001	200	Lucifer Yellow	0
P00006-T001-R000-S003	559	STG	P00006	T001	200	Lucifer Yellow	0
P00006-T001-R000-S003	560	STG	P00006	T001	200	Lucifer Yellow	0
P00006-T001-R000-S003	562	STG	P00006	T001	200	Lucifer Yellow	0
P00006-T001-R000-S003	563	STG	P00006	T001	200	Lucifer Yellow	0
P00006-T001-R000-S003	564	STG	P00006	T001	200	Lucifer Yellow	0
P00006-T001-R000-S003	565	STG	P00006	T001	200	Lucifer Yellow	0
P00006-T001-R000-S003	566	STG	P00006	T001	200	Lucifer Yellow	0
P00006-T001-R000-S003	567	STG	P00006	T001	200	Lucifer Yellow	0
P00006-T001-R000-S003	568	STG	P00006	T001	200	Lucifer Yellow	0
P00006-T001-R000-S003	569	STG	P00006	T001	200	Lucifer Yellow	0
P00006-T001-R000-S003	570	STG	P00006	T001	200	Lucifer Yellow	0
P00006-T001-R000-S003	572	STG	P00006	T001	200	Lucifer Yellow	0
P00006-T001-R000-S003	573	STG	P00006	T001	200	Lucifer Yellow	0
P00006-T001-R000-S003	574	STG	P00006	T001	200	Lucifer Yellow	0
P00006-T001-R000-S003	575	STG	P00006	T001	200	Lucifer Yellow	0
P00006-T001-R000-S003	576	STG	P00006	T001	200	Lucifer Yellow	0
P00006-T001-R000-S003	577	STG	P00006	T001	200	Lucifer Yellow	0
P00006-T001-R000-S003	578	STG	P00006	T001	200	Lucifer Yellow	0
P00006-T001-R000-S003	579	STG	P00006	T001	200	Lucifer Yellow	0
P00006-T001-R000-S003	580	STG	P00006	T001	200	Lucifer Yellow	0
P00006-T001-R000-S003	581	STG	P00006	T001	200	Lucifer Yellow	0
P00006-T001-R000-S003	582	STG	P00006	T001	200	Lucifer Yellow	0
P00006-T001-R000-S003	583	STG	P00006	T001	200	Lucifer Yellow	0
P00006-T001-R000-S003	584	STG	P00006	T001	200	Lucifer Yellow	0
P00006-T001-R000-S003	585	STG	P00006	T001	200	Lucifer Yellow	0
P00006-T001-R000-S003	586	STG	P00006	T001	200	Lucifer Yellow	0
P00006-T001-R000-S003	587	STG	P00006	T001	200	Lucifer Yellow	0
P00006-T001-R000-S003	588	STG	P00006	T001	200	Lucifer Yellow	0
P00006-T001-R000-S003	589	STG	P00006	T001	200	Lucifer Yellow	0
P00006-T001-R000-S003	590	STG	P00006	T001	200	Lucifer Yellow	0
P00006-T001-R000-S003	591	STG	P00006	T001	200	Lucifer Yellow	0
P00006-T001-R000-S003	592	STG	P00006	T001	200	Lucifer Yellow	0
P00006-T001-R000-S003	593	STG	P00006	T001	200	Lucifer Yellow	0
P00006-T001-R000-S003	594	STG	P00006	T001	200	Lucifer Yellow	0
P00006-T001-R000-S003	595	STG	P00006	T001	200	Lucifer Yellow	0
P00006-T001-R000-S003	596	STG	P00006	T001	200	Lucifer Yellow	0
P00006-T001-R000-S003	597	STG	P00006	T001	200	Lucifer Yellow	0
P00006-T001-R000-S003	598	STG	P00006	T001	200	Lucifer Yellow	0
P00006-T001-R000-S005	599	STG	P00006	T001	200	Lucifer Yellow	0
P00006-T001-R000-S005	600	STG	P00006	T001	200	Lucifer Yellow	0
P00006-T001-R000-S005	601	STG	P00006	T001	200	Lucifer Yellow	0
P00006-T001-R000-S005	602	STG	P00006	T001	200	Lucifer Yellow	0
P00006-T001-R000-S005	603	STG	P00006	T001	200	Lucifer Yellow	0
P00006-T001-R000-S005	604	STG	P00006	T001	200	Lucifer Yellow	0
P00006-T001-R000-S005	605	STG	P00006	T001	200	Lucifer Yellow	0
P00006-T001-R000-S005	606	STG	P00006	T001	200	Lucifer Yellow	0
P00006-T001-R000-S005	607	STG	P00006	T001	200	Lucifer Yellow	0
P00006-T001-R000-S005	608	STG	P00006	T001	200	Lucifer Yellow	0
P00006-T001-R000-S005	609	STG	P00006	T001	200	Lucifer Yellow	0
P00006-T001-R000-S005	611	STG	P00006	T001	200	Lucifer Yellow	0
P00006-T001-R000-S005	612	STG	P00006	T001	200	Lucifer Yellow	0
P00006-T001-R000-S005	613	STG	P00006	T001	200	Lucifer Yellow	0
P00006-T001-R000-S005	614	STG	P00006	T001	200	Lucifer Yellow	0
P00006-T001-R000-S013	615	STG	P00006	T001	200	Lucifer Yellow	0
P00006-T001-R000-S006	616	STG	P00006	T001	200	Lucifer Yellow	0
P00006-T001-R000-S006	617	STG	P00006	T001	200	Lucifer Yellow	0
P00006-T001-R000-S006	619	STG	P00006	T001	200	Lucifer Yellow	0
P00006-T001-R000-S006	620	STG	P00006	T001	200	Lucifer Yellow	0
P00006-T001-R000-S004	621	STG	P00006	T001	200	Lucifer Yellow	0
P00006-T001-R000-S004	622	STG	P00006	T001	200	Lucifer Yellow	0
P00006-T001-R000-S004	623	STG	P00006	T001	200	Lucifer Yellow	0
P00006-T001-R000-S004	624	STG	P00006	T001	200	Lucifer Yellow	0
P00006-T001-R000-S004	625	STG	P00006	T001	200	Lucifer Yellow	0
P00006-T001-R000-S004	626	STG	P00006	T001	200	Lucifer Yellow	0
P00006-T001-R000-S004	627	STG	P00006	T001	200	Lucifer Yellow	0
P00006-T001-R000-S004	628	STG	P00006	T001	200	Lucifer Yellow	0
P00006-T001-R000-S004	629	STG	P00006	T001	200	Lucifer Yellow	0
P00006-T001-R000-S004	630	STG	P00006	T001	200	Lucifer Yellow	0
P00006-T001-R000-S004	631	STG	P00006	T001	200	Lucifer Yellow	0
P00006-T001-R000-S004	632	STG	P00006	T001	200	Lucifer Yellow	0
P00006-T001-R000-S004	633	STG	P00006	T001	200	Lucifer Yellow	0
P00006-T001-R000-S004	635	STG	P00006	T001	200	Lucifer Yellow	0
P00006-T001-R000-S004	636	STG	P00006	T001	200	Lucifer Yellow	0
P00006-T001-R000-S004	637	STG	P00006	T001	200	Lucifer Yellow	0
P00006-T001-R000-S004	638	STG	P00006	T001	200	Lucifer Yellow	0
P00006-T001-R000-S004	639	STG	P00006	T001	200	Lucifer Yellow	0
P00006-T001-R000-S004	640	STG	P00006	T001	200	Lucifer Yellow	0
P00006-T001-R000-S004	641	STG	P00006	T001	200	Lucifer Yellow	0
P00006-T001-R000-S004	643	STG	P00006	T001	200	Lucifer Yellow	0
P00006-T001-R000-S004	644	STG	P00006	T001	200	Lucifer Yellow	0
P00006-T001-R000-S004	645	STG	P00006	T001	200	Lucifer Yellow	0
P00006-T001-R000-S004	646	STG	P00006	T001	200	Lucifer Yellow	0
P00006-T001-R000-S004	647	STG	P00006	T001	200	Lucifer Yellow	0
P00006-T001-R000-S004	648	STG	P00006	T001	200	Lucifer Yellow	0
P00006-T001-R000-S004	649	STG	P00006	T001	200	Lucifer Yellow	0
P00006-T001-R000-S004	650	STG	P00006	T001	200	Lucifer Yellow	0
P00006-T001-R000-S004	651	STG	P00006	T001	200	Lucifer Yellow	0
P00006-T001-R000-S004	652	STG	P00006	T001	200	Lucifer Yellow	0
P00006-T001-R000-S004	653	STG	P00006	T001	200	Lucifer Yellow	0
P00006-T001-R000-S004	654	STG	P00006	T001	200	Lucifer Yellow	0
P00006-T001-R000-S004	655	STG	P00006	T001	200	Lucifer Yellow	0
P00006-T001-R000-S004	656	STG	P00006	T001	200	Lucifer Yellow	0
P00006-T001-R000-S004	657	STG	P00006	T001	200	Lucifer Yellow	0
P00006-T001-R000-S004	658	STG	P00006	T001	200	Lucifer Yellow	0
P00006-T001-R000-S004	659	STG	P00006	T001	200	Lucifer Yellow	0
P00006-T001-R000-S004	660	STG	P00006	T001	200	Lucifer Yellow	0
P00006-T001-R000-S004	661	STG	P00006	T001	200	Lucifer Yellow	0
P00005-T001-R000-S010	662	MFG	P00005	T001	200	Lucifer Yellow	0
P00005-T001-R000-S010	663	MFG	P00005	T001	200	Lucifer Yellow	0
P00005-T001-R000-S010	664	MFG	P00005	T001	200	Lucifer Yellow	0
P00005-T001-R000-S010	665	MFG	P00005	T001	200	Lucifer Yellow	0
P00005-T001-R000-S010	666	MFG	P00005	T001	200	Lucifer Yellow	0
P00005-T001-R000-S010	667	MFG	P00005	T001	200	Lucifer Yellow	0
P00005-T001-R000-S010	668	MFG	P00005	T001	200	Lucifer Yellow	0
P00005-T001-R000-S010	669	MFG	P00005	T001	200	Lucifer Yellow	0
P00005-T001-R000-S010	671	MFG	P00005	T001	200	Lucifer Yellow	0
P00005-T001-R000-S010	672	MFG	P00005	T001	200	Lucifer Yellow	0
P00005-T001-R000-S010	673	MFG	P00005	T001	200	Lucifer Yellow	0
P00005-T001-R000-S010	674	MFG	P00005	T001	200	Lucifer Yellow	0
P00005-T001-R000-S010	675	MFG	P00005	T001	200	Lucifer Yellow	0
P00005-T001-R000-S010	676	MFG	P00005	T001	200	Lucifer Yellow	0
P00005-T001-R000-S010	678	MFG	P00005	T001	200	Lucifer Yellow	0
P00005-T001-R000-S010	679	MFG	P00005	T001	200	Lucifer Yellow	0
P00005-T001-R000-S010	680	MFG	P00005	T001	200	Lucifer Yellow	0
P00005-T001-R000-S010	681	MFG	P00005	T001	200	Lucifer Yellow	0
P00005-T001-R000-S010	682	MFG	P00005	T001	200	Lucifer Yellow	0
P00005-T001-R000-S010	683	MFG	P00005	T001	200	Lucifer Yellow	0
P00005-T001-R000-S010	684	MFG	P00005	T001	200	Lucifer Yellow	0
P00005-T001-R000-S010	685	MFG	P00005	T001	200	Lucifer Yellow	0
P00005-T001-R000-S010	686	MFG	P00005	T001	200	Lucifer Yellow	0
P00005-T001-R000-S010	687	MFG	P00005	T001	200	Lucifer Yellow	0
P00007-T001-R000-S001	688	MTG	P00007	T001	200	Lucifer Yellow	0
P00007-T001-R000-S001	689	MTG	P00007	T001	200	Lucifer Yellow	0
P00007-T001-R000-S001	690	MTG	P00007	T001	200	Lucifer Yellow	0
P00007-T001-R000-S001	691	MTG	P00007	T001	200	Lucifer Yellow	0
P00007-T001-R000-S001	692	MTG	P00007	T001	200	Lucifer Yellow	0
P00007-T001-R000-S001	694	MTG	P00007	T001	200	Lucifer Yellow	0
P00007-T001-R000-S001	695	MTG	P00007	T001	200	Lucifer Yellow	0
P00007-T001-R000-S001	696	MTG	P00007	T001	200	Lucifer Yellow	0
P00007-T001-R000-S001	697	MTG	P00007	T001	200	Lucifer Yellow	0
P00007-T001-R000-S001	698	MTG	P00007	T001	200	Lucifer Yellow	0
P00007-T001-R000-S001	699	MTG	P00007	T001	200	Lucifer Yellow	0
P00007-T001-R000-S001	700	MTG	P00007	T001	200	Lucifer Yellow	0
P00007-T001-R000-S001	701	MTG	P00007	T001	200	Lucifer Yellow	0
P00007-T001-R000-S001	702	MTG	P00007	T001	200	Lucifer Yellow	0
P00007-T001-R000-S001	703	MTG	P00007	T001	200	Lucifer Yellow	0
P00007-T001-R000-S001	704	MTG	P00007	T001	200	Lucifer Yellow	0
P00007-T001-R000-S001	705	MTG	P00007	T001	200	Lucifer Yellow	0
P00007-T001-R000-S001	706	MTG	P00007	T001	200	Lucifer Yellow	0
P00007-T001-R000-S001	707	MTG	P00007	T001	200	Lucifer Yellow	0
P00007-T001-R000-S001	708	MTG	P00007	T001	200	Lucifer Yellow	0
P00008-T001-R000-S002	709	PL.L	P00008	T001	200	Lucifer Yellow	0
P00006-T001-R000-S007	710	STG	P00006	T001	200	Lucifer Yellow	0
P00006-T001-R000-S007	711	STG	P00006	T001	200	Lucifer Yellow	0
P00006-T001-R000-S007	713	STG	P00006	T001	200	Lucifer Yellow	0
P00006-T001-R000-S007	714	STG	P00006	T001	200	Lucifer Yellow	0
P00006-T001-R000-S007	715	STG	P00006	T001	200	Lucifer Yellow	0
P00005-T001-R000-S011	716	MFG	P00005	T001	200	Lucifer Yellow	0
P00005-T001-R000-S011	717	MFG	P00005	T001	200	Lucifer Yellow	0
P00005-T001-R000-S011	718	MFG	P00005	T001	200	Lucifer Yellow	0
P00005-T001-R000-S011	719	MFG	P00005	T001	200	Lucifer Yellow	0
P00005-T001-R000-S011	720	MFG	P00005	T001	200	Lucifer Yellow	0
P00005-T001-R000-S011	721	MFG	P00005	T001	200	Lucifer Yellow	0
P00005-T001-R000-S011	722	MFG	P00005	T001	200	Lucifer Yellow	0
P00005-T001-R000-S011	723	MFG	P00005	T001	200	Lucifer Yellow	0
P00005-T001-R000-S011	724	MFG	P00005	T001	200	Lucifer Yellow	0
P00005-T001-R000-S011	725	MFG	P00005	T001	200	Lucifer Yellow	0
P00005-T001-R000-S011	726	MFG	P00005	T001	200	Lucifer Yellow	0
P00005-T001-R000-S011	727	MFG	P00005	T001	200	Lucifer Yellow	0
P00005-T001-R000-S011	728	MFG	P00005	T001	200	Lucifer Yellow	0
P00005-T001-R000-S011	730	MFG	P00005	T001	200	Lucifer Yellow	0
P00005-T001-R000-S011	731	MFG	P00005	T001	200	Lucifer Yellow	0
P00005-T001-R000-S011	732	MFG	P00005	T001	200	Lucifer Yellow	0
P00005-T001-R000-S011	733	MFG	P00005	T001	200	Lucifer Yellow	0
P00005-T001-R000-S011	735	MFG	P00005	T001	200	Lucifer Yellow	0
P00005-T001-R000-S011	736	MFG	P00005	T001	200	Lucifer Yellow	0
P00005-T001-R000-S011	737	MFG	P00005	T001	200	Lucifer Yellow	0
P00005-T001-R000-S011	738	MFG	P00005	T001	200	Lucifer Yellow	0
P00005-T001-R000-S011	739	MFG	P00005	T001	200	Lucifer Yellow	0
P00005-T001-R000-S011	740	MFG	P00005	T001	200	Lucifer Yellow	0
P00005-T001-R000-S011	741	MFG	P00005	T001	200	Lucifer Yellow	0
P00005-T001-R000-S011	742	MFG	P00005	T001	200	Lucifer Yellow	0
P00005-T001-R000-S011	743	MFG	P00005	T001	200	Lucifer Yellow	0
P00005-T001-R000-S011	744	MFG	P00005	T001	200	Lucifer Yellow	0
P00005-T001-R000-S011	745	MFG	P00005	T001	200	Lucifer Yellow	0
P00005-T001-R000-S011	746	MFG	P00005	T001	200	Lucifer Yellow	0
P00005-T001-R000-S011	747	MFG	P00005	T001	200	Lucifer Yellow	0
P00005-T001-R000-S011	748	MFG	P00005	T001	200	Lucifer Yellow	0
P00005-T001-R000-S011	749	MFG	P00005	T001	200	Lucifer Yellow	0
P00005-T001-R000-S011	750	MFG	P00005	T001	200	Lucifer Yellow	0
P00005-T001-R000-S011	751	MFG	P00005	T001	200	Lucifer Yellow	0
P00005-T001-R000-S011	752	MFG	P00005	T001	200	Lucifer Yellow	0
P00005-T001-R000-S014	754	MFG	P00005	T001	300	Lucifer Yellow	0
P00005-T001-R000-S014	755	MFG	P00005	T001	300	Lucifer Yellow	0
P00005-T001-R000-S014	756	MFG	P00005	T001	300	Lucifer Yellow	0
P00005-T001-R000-S014	757	MFG	P00005	T001	300	Lucifer Yellow	0
P00005-T001-R000-S014	758	MFG	P00005	T001	300	Lucifer Yellow	0
P00005-T001-R000-S014	759	MFG	P00005	T001	300	Lucifer Yellow	0
P00005-T001-R000-S014	760	MFG	P00005	T001	300	Lucifer Yellow	0
P00005-T001-R000-S014	761	MFG	P00005	T001	300	Lucifer Yellow	0
P00005-T001-R000-S014	762	MFG	P00005	T001	300	Lucifer Yellow	0
P00005-T001-R000-S014	763	MFG	P00005	T001	300	Lucifer Yellow	0
P00005-T001-R000-S014	765	MFG	P00005	T001	300	Lucifer Yellow	0
P00005-T001-R000-S014	766	MFG	P00005	T001	300	Lucifer Yellow	0
P00005-T001-R000-S014	767	MFG	P00005	T001	300	Lucifer Yellow	0
P00005-T001-R000-S014	768	MFG	P00005	T001	300	Lucifer Yellow	0
P00005-T001-R000-S014	769	MFG	P00005	T001	300	Lucifer Yellow	0
P00005-T001-R000-S014	770	MFG	P00005	T001	300	Lucifer Yellow	0
P00005-T001-R000-S014	771	MFG	P00005	T001	300	Lucifer Yellow	0
P00005-T001-R000-S014	772	MFG	P00005	T001	300	Lucifer Yellow	0
P00005-T001-R000-S014	773	MFG	P00005	T001	300	Lucifer Yellow	0
P00005-T001-R000-S014	774	MFG	P00005	T001	300	Lucifer Yellow	0
P00005-T001-R000-S014	775	MFG	P00005	T001	300	Lucifer Yellow	0
P00005-T001-R000-S014	776	MFG	P00005	T001	300	Lucifer Yellow	0
P00005-T001-R000-S014	777	MFG	P00005	T001	300	Lucifer Yellow	0
P00005-T001-R000-S014	778	MFG	P00005	T001	300	Lucifer Yellow	0
P00006-T001-R000-S011	779	STG	P00006	T001	200	Lucifer Yellow	0
P00006-T001-R000-S011	780	STG	P00006	T001	200	Lucifer Yellow	0
P00006-T001-R000-S011	781	STG	P00006	T001	200	Lucifer Yellow	0
P00006-T001-R000-S011	782	STG	P00006	T001	200	Lucifer Yellow	0
P00006-T001-R000-S011	783	STG	P00006	T001	200	Lucifer Yellow	0
P00006-T001-R000-S011	784	STG	P00006	T001	200	Lucifer Yellow	0
P00006-T001-R000-S011	786	STG	P00006	T001	200	Lucifer Yellow	0
P00006-T001-R000-S011	787	STG	P00006	T001	200	Lucifer Yellow	0
P00006-T001-R000-S011	788	STG	P00006	T001	200	Lucifer Yellow	0
P00006-T001-R000-S011	790	STG	P00006	T001	200	Lucifer Yellow	0
P00006-T001-R000-S011	791	STG	P00006	T001	200	Lucifer Yellow	0
P00006-T001-R000-S011	792	STG	P00006	T001	200	Lucifer Yellow	0
P00006-T001-R000-S011	793	STG	P00006	T001	200	Lucifer Yellow	0
P00006-T001-R000-S011	796	STG	P00006	T001	200	Lucifer Yellow	0
P00006-T001-R000-S011	797	STG	P00006	T001	200	Lucifer Yellow	0
P00006-T001-R000-S011	798	STG	P00006	T001	200	Lucifer Yellow	0
P00006-T001-R000-S011	799	STG	P00006	T001	200	Lucifer Yellow	0
P00006-T001-R000-S011	800	STG	P00006	T001	200	Lucifer Yellow	0
P00006-T001-R000-S011	801	STG	P00006	T001	200	Lucifer Yellow	0
P00006-T001-R000-S011	802	STG	P00006	T001	200	Lucifer Yellow	0
P00006-T001-R000-S011	803	STG	P00006	T001	200	Lucifer Yellow	0
P00009-T001-R000-S004	807	SFG	P00009	T001	200	Lucifer Yellow	0
P00009-T001-R000-S004	811	SFG	P00009	T001	200	Lucifer Yellow	0
P00005-T001-R000-S012	812	MFG	P00005	T001	200	Lucifer Yellow	0
P00005-T001-R000-S012	813	MFG	P00005	T001	200	Lucifer Yellow	0
P00005-T001-R000-S012	814	MFG	P00005	T001	200	Lucifer Yellow	0
P00005-T001-R000-S012	815	MFG	P00005	T001	200	Lucifer Yellow	0
P00005-T001-R000-S012	816	MFG	P00005	T001	200	Lucifer Yellow	0
P00005-T001-R000-S012	817	MFG	P00005	T001	200	Lucifer Yellow	0
P00005-T001-R000-S012	818	MFG	P00005	T001	200	Lucifer Yellow	0
P00005-T001-R000-S012	820	MFG	P00005	T001	200	Lucifer Yellow	0
P00006-T001-R000-S018	821	STG	P00006	T001	200	Lucifer Yellow	0
P00006-T001-R000-S018	823	STG	P00006	T001	200	Lucifer Yellow	0
P00006-T001-R000-S018	825	STG	P00006	T001	200	Lucifer Yellow	0
P00006-T001-R000-S018	827	STG	P00006	T001	200	Lucifer Yellow	0
P00006-T001-R000-S018	828	STG	P00006	T001	200	Lucifer Yellow	0
P00006-T001-R000-S018	829	STG	P00006	T001	200	Lucifer Yellow	0
P00010-T001-R000-S013	830	TP	P00010	T001	200	Lucifer Yellow	0
P00010-T001-R000-S013	831	TP	P00010	T001	200	Lucifer Yellow	0
P00010-T001-R000-S013	832	TP	P00010	T001	200	Lucifer Yellow	0
P00010-T001-R000-S013	834	TP	P00010	T001	200	Lucifer Yellow	0
P00010-T001-R000-S013	835	TP	P00010	T001	200	Lucifer Yellow	0
P00010-T001-R000-S013	836	TP	P00010	T001	200	Lucifer Yellow	0
P00010-T001-R000-S013	837	TP	P00010	T001	200	Lucifer Yellow	0
P00010-T001-R000-S013	838	TP	P00010	T001	200	Lucifer Yellow	0
P00010-T001-R000-S013	839	TP	P00010	T001	200	Lucifer Yellow	0
P00010-T001-R000-S013	840	TP	P00010	T001	200	Lucifer Yellow	0
P00010-T001-R000-S013	841	TP	P00010	T001	200	Lucifer Yellow	0
P00010-T001-R000-S013	842	TP	P00010	T001	200	Lucifer Yellow	0
P00010-T001-R000-S013	844	TP	P00010	T001	200	Lucifer Yellow	0
P00010-T001-R000-S013	845	TP	P00010	T001	200	Lucifer Yellow	0
P00010-T001-R000-S013	846	TP	P00010	T001	200	Lucifer Yellow	0
P00010-T001-R000-S013	847	TP	P00010	T001	200	Lucifer Yellow	0
P00010-T001-R000-S008	848	TP	P00010	T001	200	Lucifer Yellow	0
P00010-T001-R000-S008	849	TP	P00010	T001	200	Lucifer Yellow	0
P00010-T001-R000-S008	850	TP	P00010	T001	200	Lucifer Yellow	0
P00010-T001-R000-S008	851	TP	P00010	T001	200	Lucifer Yellow	0
P00010-T001-R000-S008	852	TP	P00010	T001	200	Lucifer Yellow	0
P00010-T001-R000-S008	853	TP	P00010	T001	200	Lucifer Yellow	0
P00010-T001-R000-S008	854	TP	P00010	T001	200	Lucifer Yellow	0
P00010-T001-R000-S008	855	TP	P00010	T001	200	Lucifer Yellow	0
P00010-T001-R000-S008	856	TP	P00010	T001	200	Lucifer Yellow	0
P00010-T001-R000-S008	857	TP	P00010	T001	200	Lucifer Yellow	0
P00010-T001-R000-S008	858	TP	P00010	T001	200	Lucifer Yellow	0
P00010-T001-R000-S008	859	TP	P00010	T001	200	Lucifer Yellow	0
P00010-T001-R000-S008	861	TP	P00010	T001	200	Lucifer Yellow	0
P00010-T001-R000-S010	863	TP	P00010	T001	200	Lucifer Yellow	0
P00010-T001-R000-S010	865	TP	P00010	T001	200	Lucifer Yellow	0
P00010-T001-R000-S010	866	TP	P00010	T001	200	Lucifer Yellow	0
P00010-T001-R000-S010	867	TP	P00010	T001	200	Lucifer Yellow	0
P00010-T001-R000-S010	868	TP	P00010	T001	200	Lucifer Yellow	0
P00010-T001-R000-S010	869	TP	P00010	T001	200	Lucifer Yellow	0
P00010-T001-R000-S012	870	TP	P00010	T001	200	Lucifer Yellow	0
P00010-T001-R000-S012	871	TP	P00010	T001	200	Lucifer Yellow	0
P00010-T001-R000-S012	872	TP	P00010	T001	200	Lucifer Yellow	0
P00010-T001-R000-S012	873	TP	P00010	T001	200	Lucifer Yellow	0
P00010-T001-R000-S012	874	TP	P00010	T001	200	Lucifer Yellow	0
P00010-T001-R000-S012	875	TP	P00010	T001	200	Lucifer Yellow	0
P00010-T001-R000-S012	876	TP	P00010	T001	200	Lucifer Yellow	0
P00010-T001-R000-S012	877	TP	P00010	T001	200	Lucifer Yellow	0
P00010-T001-R000-S012	878	TP	P00010	T001	200	Lucifer Yellow	0
P00010-T001-R000-S012	879	TP	P00010	T001	200	Lucifer Yellow	0
P00010-T001-R000-S012	880	TP	P00010	T001	200	Lucifer Yellow	0
P00010-T001-R000-S012	881	TP	P00010	T001	200	Lucifer Yellow	0
P00010-T001-R000-S012	882	TP	P00010	T001	200	Lucifer Yellow	0
P00010-T001-R000-S012	883	TP	P00010	T001	200	Lucifer Yellow	0
P00010-T001-R000-S012	884	TP	P00010	T001	200	Lucifer Yellow	0
P00010-T001-R000-S012	885	TP	P00010	T001	200	Lucifer Yellow	0
P00010-T001-R000-S012	886	TP	P00010	T001	200	Lucifer Yellow	0
P00010-T001-R000-S012	888	TP	P00010	T001	200	Lucifer Yellow	0
P00010-T001-R000-S012	889	TP	P00010	T001	200	Lucifer Yellow	0
P00010-T001-R000-S012	890	TP	P00010	T001	200	Lucifer Yellow	0
P00010-T001-R000-S012	891	TP	P00010	T001	200	Lucifer Yellow	0
P00010-T001-R000-S012	892	TP	P00010	T001	200	Lucifer Yellow	0
P00010-T001-R000-S012	893	TP	P00010	T001	200	Lucifer Yellow	0
P00010-T001-R000-S012	894	TP	P00010	T001	200	Lucifer Yellow	0
P00010-T001-R000-S012	895	TP	P00010	T001	200	Lucifer Yellow	0
P00010-T001-R000-S012	896	TP	P00010	T001	200	Lucifer Yellow	0
P00010-T001-R000-S012	897	TP	P00010	T001	200	Lucifer Yellow	0
P00010-T001-R000-S012	898	TP	P00010	T001	200	Lucifer Yellow	0
P00010-T001-R000-S012	899	TP	P00010	T001	200	Lucifer Yellow	0
P00010-T001-R000-S012	900	TP	P00010	T001	200	Lucifer Yellow	0
P00010-T001-R000-S012	901	TP	P00010	T001	200	Lucifer Yellow	0
P00010-T001-R000-S012	902	TP	P00010	T001	200	Lucifer Yellow	0
P00010-T001-R000-S012	903	TP	P00010	T001	200	Lucifer Yellow	0
P00011-T001-R000-S001	904	STG-AP	P00011	T001	300	Lucifer Yellow	0
P00011-T001-R000-S001	905	STG-AP	P00011	T001	300	Lucifer Yellow	0
P00011-T001-R000-S001	906	STG-AP	P00011	T001	300	Lucifer Yellow	0
P00011-T001-R000-S001	907	STG-AP	P00011	T001	300	Lucifer Yellow	0
P00011-T001-R000-S001	908	STG-AP	P00011	T001	300	Lucifer Yellow	0
P00011-T001-R000-S001	909	STG-AP	P00011	T001	300	Lucifer Yellow	0
P00011-T001-R000-S001	910	STG-AP	P00011	T001	300	Lucifer Yellow	0
P00011-T001-R000-S001	911	STG-AP	P00011	T001	300	Lucifer Yellow	0
P00011-T001-R000-S001	912	STG-AP	P00011	T001	300	Lucifer Yellow	0
P00011-T001-R000-S001	913	STG-AP	P00011	T001	300	Lucifer Yellow	0
P00011-T001-R000-S001	914	STG-AP	P00011	T001	300	Lucifer Yellow	0
P00011-T001-R000-S001	915	STG-AP	P00011	T001	300	Lucifer Yellow	0
P00010-T001-R000-S007	916	TP	P00010	T001	200	Lucifer Yellow	0
P00010-T001-R000-S007	917	TP	P00010	T001	200	Lucifer Yellow	0
P00010-T001-R000-S007	918	TP	P00010	T001	200	Lucifer Yellow	0
P00010-T001-R000-S007	919	TP	P00010	T001	200	Lucifer Yellow	0
P00010-T001-R000-S007	920	TP	P00010	T001	200	Lucifer Yellow	0
P00010-T001-R000-S007	921	TP	P00010	T001	200	Lucifer Yellow	0
P00010-T001-R000-S007	922	TP	P00010	T001	200	Lucifer Yellow	0
P00010-T001-R000-S007	923	TP	P00010	T001	200	Lucifer Yellow	0
P00010-T001-R000-S007	924	TP	P00010	T001	200	Lucifer Yellow	0
P00009-T001-R000-S026	925	SFG	P00009	T001	200	Lucifer Yellow	0
P00009-T001-R000-S026	926	SFG	P00009	T001	200	Lucifer Yellow	0
P00009-T001-R000-S026	927	SFG	P00009	T001	200	Lucifer Yellow	0
P00009-T001-R000-S026	928	SFG	P00009	T001	200	Lucifer Yellow	0
P00009-T001-R000-S026	929	SFG	P00009	T001	200	Lucifer Yellow	0
P00009-T001-R000-S026	930	SFG	P00009	T001	200	Lucifer Yellow	0
P00009-T001-R000-S026	931	SFG	P00009	T001	200	Lucifer Yellow	0
P00009-T001-R000-S026	932	SFG	P00009	T001	200	Lucifer Yellow	0
P00009-T001-R000-S026	933	SFG	P00009	T001	200	Lucifer Yellow	0
P00009-T001-R000-S026	934	SFG	P00009	T001	200	Lucifer Yellow	0
P00008-T001-R000-S010	935	PL.L	P00008	T001	200	Lucifer Yellow	0
P00009-T001-R000-S035	936	SFG	P00009	T001	200	Lucifer Yellow	0
P00008-T001-R000-S007	938	PL.L	P00008	T001	200	Lucifer Yellow	0
P00008-T001-R000-S007	939	PL.L	P00008	T001	200	Lucifer Yellow	0
P00008-T001-R000-S022	940	PL.L	P00008	T001	200	Lucifer Yellow	0
P00010-T001-R000-S018	941	TP	P00010	T001	200	Lucifer Yellow	0
P00010-T001-R000-S018	942	TP	P00010	T001	200	Lucifer Yellow	0
P00010-T001-R000-S018	943	TP	P00010	T001	200	Lucifer Yellow	0
P00010-T001-R000-S018	944	TP	P00010	T001	200	Lucifer Yellow	0
P00010-T001-R000-S018	945	TP	P00010	T001	200	Lucifer Yellow	0
P00010-T001-R000-S018	946	TP	P00010	T001	200	Lucifer Yellow	0
P00010-T001-R000-S018	947	TP	P00010	T001	200	Lucifer Yellow	0
P00010-T001-R000-S018	948	TP	P00010	T001	200	Lucifer Yellow	0
P00010-T001-R000-S018	949	TP	P00010	T001	200	Lucifer Yellow	0
P00010-T001-R000-S018	950	TP	P00010	T001	200	Lucifer Yellow	0
P00010-T001-R000-S018	951	TP	P00010	T001	200	Lucifer Yellow	0
P00010-T001-R000-S018	952	TP	P00010	T001	200	Lucifer Yellow	0
P00010-T001-R000-S018	953	TP	P00010	T001	200	Lucifer Yellow	0
P00010-T001-R000-S018	954	TP	P00010	T001	200	Lucifer Yellow	0
P00010-T001-R000-S018	955	TP	P00010	T001	200	Lucifer Yellow	0
P00010-T001-R000-S018	956	TP	P00010	T001	200	Lucifer Yellow	0
P00010-T001-R000-S018	957	TP	P00010	T001	200	Lucifer Yellow	0
P00011-T001-R000-S002	958	STG-AP	P00011	T001	300	Lucifer Yellow	0
P00011-T001-R000-S002	959	STG-AP	P00011	T001	300	Lucifer Yellow	0
P00011-T001-R000-S002	960	STG-AP	P00011	T001	300	Lucifer Yellow	0
P00011-T001-R000-S002	961	STG-AP	P00011	T001	300	Lucifer Yellow	0
P00011-T001-R000-S002	962	STG-AP	P00011	T001	300	Lucifer Yellow	0
P00011-T001-R000-S002	963	STG-AP	P00011	T001	300	Lucifer Yellow	0
P00011-T001-R000-S002	964	STG-AP	P00011	T001	300	Lucifer Yellow	0
P00011-T001-R000-S002	965	STG-AP	P00011	T001	300	Lucifer Yellow	0
P00011-T001-R000-S002	966	STG-AP	P00011	T001	300	Lucifer Yellow	0
P00011-T001-R000-S002	968	STG-AP	P00011	T001	300	Lucifer Yellow	0
P00011-T001-R000-S002	969	STG-AP	P00011	T001	300	Lucifer Yellow	0
P00011-T001-R000-S002	970	STG-AP	P00011	T001	300	Lucifer Yellow	0
P00011-T001-R000-S002	972	STG-AP	P00011	T001	300	Lucifer Yellow	0
P00011-T001-R000-S002	973	STG-AP	P00011	T001	300	Lucifer Yellow	0
P00011-T001-R000-S002	974	STG-AP	P00011	T001	300	Lucifer Yellow	0
P00011-T001-R000-S002	976	STG-AP	P00011	T001	300	Lucifer Yellow	0
P00010-T001-R000-S017	978	TP	P00010	T001	200	Lucifer Yellow	0
P00010-T001-R000-S017	979	TP	P00010	T001	200	Lucifer Yellow	0
P00010-T001-R000-S017	980	TP	P00010	T001	200	Lucifer Yellow	0
P00010-T001-R000-S017	981	TP	P00010	T001	200	Lucifer Yellow	0
P00010-T001-R000-S017	982	TP	P00010	T001	200	Lucifer Yellow	0
P00010-T001-R000-S017	983	TP	P00010	T001	200	Lucifer Yellow	0
P00010-T001-R000-S017	985	TP	P00010	T001	200	Lucifer Yellow	0
P00010-T001-R000-S019	987	TP	P00010	T001	200	Lucifer Yellow	0
P00010-T001-R000-S019	988	TP	P00010	T001	200	Lucifer Yellow	0
P00010-T001-R000-S019	989	TP	P00010	T001	200	Lucifer Yellow	0
P00010-T001-R000-S019	990	TP	P00010	T001	200	Lucifer Yellow	0
P00010-T001-R000-S019	991	TP	P00010	T001	200	Lucifer Yellow	0
P00010-T001-R000-S019	992	TP	P00010	T001	200	Lucifer Yellow	0
P00010-T001-R000-S019	993	TP	P00010	T001	200	Lucifer Yellow	0
P00010-T001-R000-S019	997	TP	P00010	T001	200	Lucifer Yellow	0
P00010-T001-R000-S019	998	TP	P00010	T001	200	Lucifer Yellow	0
P00010-T001-R000-S019	999	TP	P00010	T001	200	Lucifer Yellow	0
P00010-T001-R000-S019	1000	TP	P00010	T001	200	Lucifer Yellow	0
P00010-T001-R000-S019	1001	TP	P00010	T001	200	Lucifer Yellow	0
P00010-T001-R000-S019	1002	TP	P00010	T001	200	Lucifer Yellow	0
P00010-T001-R000-S019	1003	TP	P00010	T001	200	Lucifer Yellow	0
P00012-T001-R000-S002	1005	PL	P00012	T001	200	Lucifer Yellow	0
P00012-T001-R000-S002	1008	PL	P00012	T001	200	Lucifer Yellow	0
P00008-T001-R000-S036	1010	PL.L	P00008	T001	200	Lucifer Yellow	0
P00008-T001-R000-S036	1012	PL.L	P00008	T001	200	Lucifer Yellow	0
P00008-T001-R000-S036	1013	PL.L	P00008	T001	200	Lucifer Yellow	0
P00008-T002-R000-S019	1014	PL.L	P00008	T002	200	Lucifer Yellow	0
P00008-T002-R000-S019	1015	PL.L	P00008	T002	200	Lucifer Yellow	0
P00008-T002-R000-S019	1016	PL.L	P00008	T002	200	Lucifer Yellow	0
P00010-T001-R000-S020	1019	TP	P00010	T001	200	Lucifer Yellow	0
P00010-T001-R000-S023	1020	TP	P00010	T001	200	Lucifer Yellow	0
P00010-T001-R000-S020	1021	TP	P00010	T001	200	Lucifer Yellow	0
P00010-T001-R000-S020	1022	TP	P00010	T001	200	Lucifer Yellow	0
P00010-T001-R000-S020	1023	TP	P00010	T001	200	Lucifer Yellow	0
P00010-T001-R000-S020	1024	TP	P00010	T001	200	Lucifer Yellow	0
P00010-T001-R000-S020	1025	TP	P00010	T001	200	Lucifer Yellow	0
P00010-T001-R000-S020	1026	TP	P00010	T001	200	Lucifer Yellow	0
P00010-T001-R000-S020	1027	TP	P00010	T001	200	Lucifer Yellow	0
P00010-T001-R000-S020	1028	TP	P00010	T001	200	Lucifer Yellow	0
P00010-T001-R000-S020	1031	TP	P00010	T001	200	Lucifer Yellow	0
P00010-T001-R000-S020	1032	TP	P00010	T001	200	Lucifer Yellow	0
P00010-T001-R000-S020	1033	TP	P00010	T001	200	Lucifer Yellow	0
P00010-T001-R000-S020	1034	TP	P00010	T001	200	Lucifer Yellow	0
P00010-T001-R000-S020	1035	TP	P00010	T001	200	Lucifer Yellow	0
P00010-T001-R000-S020	1036	TP	P00010	T001	200	Lucifer Yellow	0
P00010-T001-R000-S020	1037	TP	P00010	T001	200	Lucifer Yellow	0
P00010-T001-R000-S020	1038	TP	P00010	T001	200	Lucifer Yellow	0
P00010-T001-R000-S023	1039	TP	P00010	T001	200	Lucifer Yellow	0
P00010-T001-R000-S023	1040	TP	P00010	T001	200	Lucifer Yellow	0
P00010-T001-R000-S023	1041	TP	P00010	T001	200	Lucifer Yellow	0
P00010-T001-R000-S023	1042	TP	P00010	T001	200	Lucifer Yellow	0
P00010-T001-R000-S023	1043	TP	P00010	T001	200	Lucifer Yellow	0
P00008-T002-R000-S016	1045	PL.L	P00008	T002	200	Lucifer Yellow	0
P00008-T002-R000-S016	1046	PL.L	P00008	T002	200	Lucifer Yellow	0
P00008-T002-R000-S016	1047	PL.L	P00008	T002	200	Lucifer Yellow	0
P00008-T002-R000-S016	1048	PL.L	P00008	T002	200	Lucifer Yellow	0
P00008-T002-R000-S016	1049	PL.L	P00008	T002	200	Lucifer Yellow	0
P00008-T002-R000-S016	1050	PL.L	P00008	T002	200	Lucifer Yellow	0
P00008-T002-R000-S016	1051	PL.L	P00008	T002	200	Lucifer Yellow	0
P00008-T001-R000-S040	1052	PL.L	P00008	T001	200	Lucifer Yellow	0
P00008-T001-R000-S040	1053	PL.L	P00008	T001	200	Lucifer Yellow	0
P00008-T001-R000-S040	1055	PL.L	P00008	T001	200	Lucifer Yellow	0
P00008-T001-R000-S040	1056	PL.L	P00008	T001	200	Lucifer Yellow	0
P00008-T001-R000-S040	1057	PL.L	P00008	T001	200	Lucifer Yellow	0
P00008-T001-R000-S040	1058	PL.L	P00008	T001	200	Lucifer Yellow	0
P00008-T001-R000-S040	1059	PL.L	P00008	T001	200	Lucifer Yellow	0
P00008-T001-R000-S040	1060	PL.L	P00008	T001	200	Lucifer Yellow	0
P00013-T002-R000-S016	1062	S(M)FG.R	P00013	T002	200	Lucifer Yellow	0
P00013-T002-R000-S016	1063	S(M)FG.R	P00013	T002	200	Lucifer Yellow	0
P00008-T001-R000-S037	1065	PL.L	P00008	T001	200	Lucifer Yellow	0
P00008-T001-R000-S037	1066	PL.L	P00008	T001	200	Lucifer Yellow	0
P00008-T001-R000-S014	1069	PL.L	P00008	T001	200	Lucifer Yellow	0
P00008-T001-R000-S014	1070	PL.L	P00008	T001	200	Lucifer Yellow	0
P00008-T001-R000-S014	1071	PL.L	P00008	T001	200	Lucifer Yellow	0
P00008-T001-R000-S014	1072	PL.L	P00008	T001	200	Lucifer Yellow	0
P00008-T001-R000-S014	1073	PL.L	P00008	T001	200	Lucifer Yellow	0
P00008-T001-R000-S014	1076	PL.L	P00008	T001	200	Lucifer Yellow	0
P00008-T001-R000-S019	1077	PL.L	P00008	T001	200	Lucifer Yellow	0
P00008-T001-R000-S019	1078	PL.L	P00008	T001	200	Lucifer Yellow	0
P00008-T001-R000-S019	1081	PL.L	P00008	T001	200	Lucifer Yellow	0
P00013-T002-R000-S018	1082	S(M)FG.R	P00013	T002	200	Lucifer Yellow	0
P00013-T002-R000-S018	1083	S(M)FG.R	P00013	T002	200	Lucifer Yellow	0
P00013-T002-R000-S018	1084	S(M)FG.R	P00013	T002	200	Lucifer Yellow	0
P00013-T002-R000-S018	1085	S(M)FG.R	P00013	T002	200	Lucifer Yellow	0
P00008-T001-R000-S015	1086	PL.L	P00008	T001	200	Lucifer Yellow	0
P00008-T001-R000-S015	1087	PL.L	P00008	T001	200	Lucifer Yellow	0
P00008-T001-R000-S015	1089	PL.L	P00008	T001	200	Lucifer Yellow	0
P00008-T001-R000-S015	1090	PL.L	P00008	T001	200	Lucifer Yellow	0
P00008-T001-R000-S015	1091	PL.L	P00008	T001	200	Lucifer Yellow	0
P00008-T001-R000-S015	1094	PL.L	P00008	T001	200	Lucifer Yellow	0
P00008-T001-R000-S015	1095	PL.L	P00008	T001	200	Lucifer Yellow	0
P00008-T001-R000-S012	1096	PL.L	P00008	T001	200	Lucifer Yellow	0
P00008-T001-R000-S012	1097	PL.L	P00008	T001	200	Lucifer Yellow	0
P00008-T001-R000-S012	1098	PL.L	P00008	T001	200	Lucifer Yellow	0
P00008-T001-R000-S012	1101	PL.L	P00008	T001	200	Lucifer Yellow	0
P00008-T001-R000-S012	1102	PL.L	P00008	T001	200	Lucifer Yellow	0
P00008-T001-R000-S012	1103	PL.L	P00008	T001	200	Lucifer Yellow	0
P00008-T001-R000-S012	1104	PL.L	P00008	T001	200	Lucifer Yellow	0
P00008-T001-R000-S012	1105	PL.L	P00008	T001	200	Lucifer Yellow	0
P00008-T001-R000-S012	1106	PL.L	P00008	T001	200	Lucifer Yellow	0
P00008-T001-R000-S012	1107	PL.L	P00008	T001	200	Lucifer Yellow	0
P00013-T002-R000-S026	1110	S(M)FG.R	P00013	T002	200	Lucifer Yellow	0
P00013-T002-R000-S026	1111	S(M)FG.R	P00013	T002	200	Lucifer Yellow	0
P00013-T002-R000-S026	1112	S(M)FG.R	P00013	T002	200	Lucifer Yellow	0
P00013-T002-R000-S026	1113	S(M)FG.R	P00013	T002	200	Lucifer Yellow	0
P00013-T002-R000-S026	1116	S(M)FG.R	P00013	T002	200	Lucifer Yellow	0
P00010-T001-R000-S009	1119	TP	P00010	T001	200	Lucifer Yellow	0
P00010-T001-R000-S009	1120	TP	P00010	T001	200	Lucifer Yellow	0
P00010-T001-R000-S009	1121	TP	P00010	T001	200	Lucifer Yellow	0
P00010-T001-R000-S009	1122	TP	P00010	T001	200	Lucifer Yellow	0
P00010-T001-R000-S009	1124	TP	P00010	T001	200	Lucifer Yellow	0
P00010-T001-R000-S009	1125	TP	P00010	T001	200	Lucifer Yellow	0
P00010-T001-R000-S009	1126	TP	P00010	T001	200	Lucifer Yellow	0
P00010-T001-R000-S009	1127	TP	P00010	T001	200	Lucifer Yellow	0
P00010-T001-R000-S009	1128	TP	P00010	T001	200	Lucifer Yellow	0
P00010-T001-R000-S009	1130	TP	P00010	T001	200	Lucifer Yellow	0
P00010-T001-R000-S009	1131	TP	P00010	T001	200	Lucifer Yellow	0
P00010-T001-R000-S009	1132	TP	P00010	T001	200	Lucifer Yellow	0
P00010-T001-R000-S009	1133	TP	P00010	T001	200	Lucifer Yellow	0
P00010-T001-R000-S009	1134	TP	P00010	T001	200	Lucifer Yellow	0
P00010-T001-R000-S009	1135	TP	P00010	T001	200	Lucifer Yellow	0
P00010-T001-R000-S009	1136	TP	P00010	T001	200	Lucifer Yellow	0
P00010-T001-R000-S009	1137	TP	P00010	T001	200	Lucifer Yellow	0
P00010-T001-R000-S009	1138	TP	P00010	T001	200	Lucifer Yellow	0
P00010-T001-R000-S009	1139	TP	P00010	T001	200	Lucifer Yellow	0
P00010-T001-R000-S009	1142	TP	P00010	T001	200	Lucifer Yellow	0
P00010-T001-R000-S009	1143	TP	P00010	T001	200	Lucifer Yellow	0
P00010-T001-R000-S009	1144	TP	P00010	T001	200	Lucifer Yellow	0
P00010-T001-R000-S009	1145	TP	P00010	T001	200	Lucifer Yellow	0
P00014-T001-R000-S012	1146	MFG.R	P00014	T001	200	Lucifer Yellow	0
P00014-T001-R000-S012	1147	MFG.R	P00014	T001	200	Lucifer Yellow	0
P00014-T001-R000-S012	1149	MFG.R	P00014	T001	200	Lucifer Yellow	0
P00014-T001-R000-S012	1151	MFG.R	P00014	T001	200	Lucifer Yellow	0
P00014-T001-R000-S012	1152	MFG.R	P00014	T001	200	Lucifer Yellow	0
P00014-T001-R000-S012	1153	MFG.R	P00014	T001	200	Lucifer Yellow	0
P00010-T001-R000-S006	1155	TP	P00010	T001	200	Lucifer Yellow	0
P00010-T001-R000-S006	1156	TP	P00010	T001	200	Lucifer Yellow	0
P00010-T001-R000-S006	1157	TP	P00010	T001	200	Lucifer Yellow	0
P00010-T001-R000-S021	1158	TP	P00010	T001	200	Lucifer Yellow	0
P00010-T001-R000-S021	1159	TP	P00010	T001	200	Lucifer Yellow	0
P00010-T001-R000-S021	1160	TP	P00010	T001	200	Lucifer Yellow	0
P00010-T001-R000-S021	1161	TP	P00010	T001	200	Lucifer Yellow	0
P00010-T001-R000-S021	1162	TP	P00010	T001	200	Lucifer Yellow	0
P00010-T001-R000-S021	1163	TP	P00010	T001	200	Lucifer Yellow	0
P00010-T001-R000-S021	1164	TP	P00010	T001	200	Lucifer Yellow	0
P00010-T001-R000-S021	1165	TP	P00010	T001	200	Lucifer Yellow	0
P00010-T001-R000-S021	1166	TP	P00010	T001	200	Lucifer Yellow	0
P00010-T001-R000-S021	1167	TP	P00010	T001	200	Lucifer Yellow	0
P00010-T001-R000-S021	1168	TP	P00010	T001	200	Lucifer Yellow	0
P00010-T001-R000-S021	1169	TP	P00010	T001	200	Lucifer Yellow	0
P00010-T001-R000-S021	1170	TP	P00010	T001	200	Lucifer Yellow	0
P00010-T001-R000-S021	1171	TP	P00010	T001	200	Lucifer Yellow	0
P00010-T001-R000-S021	1172	TP	P00010	T001	200	Lucifer Yellow	0
P00010-T001-R000-S021	1173	TP	P00010	T001	200	Lucifer Yellow	0
P00010-T001-R000-S021	1174	TP	P00010	T001	200	Lucifer Yellow	0
P00010-T001-R000-S021	1175	TP	P00010	T001	200	Lucifer Yellow	0
P00010-T001-R000-S021	1176	TP	P00010	T001	200	Lucifer Yellow	0
P00010-T001-R000-S021	1177	TP	P00010	T001	200	Lucifer Yellow	0
P00010-T001-R000-S021	1178	TP	P00010	T001	200	Lucifer Yellow	0
P00010-T001-R000-S021	1180	TP	P00010	T001	200	Lucifer Yellow	0
P00010-T001-R000-S021	1181	TP	P00010	T001	200	Lucifer Yellow	0
P00010-T001-R000-S014	1182	TP	P00010	T001	200	Lucifer Yellow	0
P00010-T001-R000-S014	1183	TP	P00010	T001	200	Lucifer Yellow	0
P00010-T001-R000-S014	1184	TP	P00010	T001	200	Lucifer Yellow	0
P00010-T001-R000-S014	1185	TP	P00010	T001	200	Lucifer Yellow	0
P00010-T001-R000-S014	1186	TP	P00010	T001	200	Lucifer Yellow	0
P00010-T001-R000-S014	1187	TP	P00010	T001	200	Lucifer Yellow	0
P00010-T001-R000-S014	1188	TP	P00010	T001	200	Lucifer Yellow	0
P00010-T001-R000-S014	1189	TP	P00010	T001	200	Lucifer Yellow	0
P00010-T001-R000-S014	1190	TP	P00010	T001	200	Lucifer Yellow	0
P00010-T001-R000-S014	1191	TP	P00010	T001	200	Lucifer Yellow	0
P00010-T001-R000-S014	1192	TP	P00010	T001	200	Lucifer Yellow	0
P00010-T001-R000-S014	1193	TP	P00010	T001	200	Lucifer Yellow	0
P00010-T001-R000-S014	1194	TP	P00010	T001	200	Lucifer Yellow	0
P00010-T001-R000-S015	1195	TP	P00010	T001	200	Lucifer Yellow	0
P00010-T001-R000-S015	1196	TP	P00010	T001	200	Lucifer Yellow	0
P00010-T001-R000-S015	1197	TP	P00010	T001	200	Lucifer Yellow	0
P00010-T001-R000-S015	1198	TP	P00010	T001	200	Lucifer Yellow	0
P00010-T001-R000-S015	1199	TP	P00010	T001	200	Lucifer Yellow	0
P00010-T001-R000-S015	1200	TP	P00010	T001	200	Lucifer Yellow	0
P00010-T001-R000-S015	1201	TP	P00010	T001	200	Lucifer Yellow	0
P00010-T001-R000-S015	1202	TP	P00010	T001	200	Lucifer Yellow	0
P00010-T001-R000-S015	1203	TP	P00010	T001	200	Lucifer Yellow	0
P00010-T001-R000-S015	1204	TP	P00010	T001	200	Lucifer Yellow	0
P00010-T001-R000-S015	1205	TP	P00010	T001	200	Lucifer Yellow	0
P00010-T001-R000-S015	1206	TP	P00010	T001	200	Lucifer Yellow	0
P00010-T001-R000-S015	1207	TP	P00010	T001	200	Lucifer Yellow	0
P00010-T001-R000-S015	1208	TP	P00010	T001	200	Lucifer Yellow	0
P00010-T001-R000-S015	1209	TP	P00010	T001	200	Lucifer Yellow	0
P00010-T001-R000-S015	1210	TP	P00010	T001	200	Lucifer Yellow	0
P00010-T001-R000-S015	1211	TP	P00010	T001	200	Lucifer Yellow	0
P00010-T001-R000-S015	1212	TP	P00010	T001	200	Lucifer Yellow	0
P00010-T001-R000-S015	1213	TP	P00010	T001	200	Lucifer Yellow	0
P00010-T001-R000-S015	1214	TP	P00010	T001	200	Lucifer Yellow	0
P00010-T001-R000-S015	1215	TP	P00010	T001	200	Lucifer Yellow	0
P00010-T001-R000-S015	1216	TP	P00010	T001	200	Lucifer Yellow	0
P00010-T001-R000-S015	1217	TP	P00010	T001	200	Lucifer Yellow	0
P00010-T001-R000-S015	1218	TP	P00010	T001	200	Lucifer Yellow	0
P00010-T001-R000-S015	1219	TP	P00010	T001	200	Lucifer Yellow	0
P00010-T001-R000-S015	1220	TP	P00010	T001	200	Lucifer Yellow	0
P00010-T001-R000-S015	1221	TP	P00010	T001	200	Lucifer Yellow	0
P00010-T001-R000-S015	1222	TP	P00010	T001	200	Lucifer Yellow	0
P00010-T001-R000-S015	1223	TP	P00010	T001	200	Lucifer Yellow	0
P00010-T001-R000-S015	1224	TP	P00010	T001	200	Lucifer Yellow	0
P00010-T001-R000-S015	1225	TP	P00010	T001	200	Lucifer Yellow	0
P00010-T001-R000-S015	1226	TP	P00010	T001	200	Lucifer Yellow	0
P00014-T001-R000-S028	1227	MFG.R	P00014	T001	200	Lucifer Yellow	0
P00014-T001-R000-S028	1228	MFG.R	P00014	T001	200	Lucifer Yellow	0
P00014-T001-R000-S028	1229	MFG.R	P00014	T001	200	Lucifer Yellow	0
P00014-T001-R000-S028	1230	MFG.R	P00014	T001	200	Lucifer Yellow	0
P00014-T001-R000-S028	1231	MFG.R	P00014	T001	200	Lucifer Yellow	0
P00014-T001-R000-S028	1232	MFG.R	P00014	T001	200	Lucifer Yellow	0
P00014-T001-R000-S028	1233	MFG.R	P00014	T001	200	Lucifer Yellow	0
P00014-T001-R000-S028	1234	MFG.R	P00014	T001	200	Lucifer Yellow	0
P00014-T001-R000-S028	1235	MFG.R	P00014	T001	200	Lucifer Yellow	0
P00014-T001-R000-S028	1236	MFG.R	P00014	T001	200	Lucifer Yellow	0
P00014-T001-R000-S028	1237	MFG.R	P00014	T001	200	Lucifer Yellow	0
P00014-T001-R000-S028	1238	MFG.R	P00014	T001	200	Lucifer Yellow	0
P00014-T001-R000-S028	1239	MFG.R	P00014	T001	200	Lucifer Yellow	0
P00014-T001-R000-S028	1240	MFG.R	P00014	T001	200	Lucifer Yellow	0
P00014-T001-R000-S028	1241	MFG.R	P00014	T001	200	Lucifer Yellow	0
P00010-T001-R000-S016	1242	TP	P00010	T001	200	Lucifer Yellow	0
P00010-T001-R000-S016	1243	TP	P00010	T001	200	Lucifer Yellow	0
P00010-T001-R000-S016	1244	TP	P00010	T001	200	Lucifer Yellow	0
P00010-T001-R000-S016	1245	TP	P00010	T001	200	Lucifer Yellow	0
P00010-T001-R000-S016	1246	TP	P00010	T001	200	Lucifer Yellow	0
P00010-T001-R000-S016	1247	TP	P00010	T001	200	Lucifer Yellow	0
P00010-T001-R000-S016	1248	TP	P00010	T001	200	Lucifer Yellow	0
P00010-T001-R000-S016	1249	TP	P00010	T001	200	Lucifer Yellow	0
P00010-T001-R000-S016	1250	TP	P00010	T001	200	Lucifer Yellow	0
P00010-T001-R000-S016	1251	TP	P00010	T001	200	Lucifer Yellow	0
P00010-T001-R000-S016	1252	TP	P00010	T001	200	Lucifer Yellow	0
P00010-T001-R000-S016	1253	TP	P00010	T001	200	Lucifer Yellow	0
P00010-T001-R000-S016	1255	TP	P00010	T001	200	Lucifer Yellow	0
P00010-T001-R000-S016	1256	TP	P00010	T001	200	Lucifer Yellow	0
P00010-T001-R000-S016	1257	TP	P00010	T001	200	Lucifer Yellow	0
P00010-T001-R000-S016	1260	TP	P00010	T001	200	Lucifer Yellow	0
P00010-T001-R000-S016	1261	TP	P00010	T001	200	Lucifer Yellow	0
P00010-T001-R000-S016	1262	TP	P00010	T001	200	Lucifer Yellow	0
P00010-T001-R000-S016	1263	TP	P00010	T001	200	Lucifer Yellow	0
P00010-T001-R000-S016	1264	TP	P00010	T001	200	Lucifer Yellow	0
P00010-T001-R000-S016	1265	TP	P00010	T001	200	Lucifer Yellow	0
P00010-T001-R000-S016	1266	TP	P00010	T001	200	Lucifer Yellow	0
P00010-T001-R000-S016	1267	TP	P00010	T001	200	Lucifer Yellow	0
P00010-T001-R000-S016	1268	TP	P00010	T001	200	Lucifer Yellow	0
P00014-T001-R000-S013	1269	MFG.R	P00014	T001	200	Lucifer Yellow	0
P00014-T001-R000-S013	1270	MFG.R	P00014	T001	200	Lucifer Yellow	0
P00014-T001-R000-S013	1271	MFG.R	P00014	T001	200	Lucifer Yellow	0
P00014-T001-R000-S013	1272	MFG.R	P00014	T001	200	Lucifer Yellow	0
P00014-T001-R000-S013	1273	MFG.R	P00014	T001	200	Lucifer Yellow	0
P00014-T001-R000-S013	1274	MFG.R	P00014	T001	200	Lucifer Yellow	0
P00014-T001-R000-S013	1275	MFG.R	P00014	T001	200	Lucifer Yellow	0
P00014-T001-R000-S013	1276	MFG.R	P00014	T001	200	Lucifer Yellow	0
P00014-T001-R000-S013	1277	MFG.R	P00014	T001	200	Lucifer Yellow	0
P00014-T001-R000-S013	1278	MFG.R	P00014	T001	200	Lucifer Yellow	0
P00014-T001-R000-S013	1279	MFG.R	P00014	T001	200	Lucifer Yellow	0
P00014-T001-R000-S013	1280	MFG.R	P00014	T001	200	Lucifer Yellow	0
P00014-T001-R000-S013	1281	MFG.R	P00014	T001	200	Lucifer Yellow	0
P00010-T001-R000-S011	1282	TP	P00010	T001	200	Lucifer Yellow	0
P00010-T001-R000-S011	1284	TP	P00010	T001	200	Lucifer Yellow	0
P00010-T001-R000-S011	1286	TP	P00010	T001	200	Lucifer Yellow	0
P00010-T001-R000-S011	1287	TP	P00010	T001	200	Lucifer Yellow	0
P00014-T001-R000-S027	1288	MFG.R	P00014	T001	200	Lucifer Yellow	0
P00014-T001-R000-S027	1289	MFG.R	P00014	T001	200	Lucifer Yellow	0
P00010-T001-R000-S022	1290	TP	P00010	T001	200	Lucifer Yellow	0
P00010-T001-R000-S022	1292	TP	P00010	T001	200	Lucifer Yellow	0
P00010-T001-R000-S022	1293	TP	P00010	T001	200	Lucifer Yellow	0
P00015-T003-R000-S013	1295	(X)FG	P00015	T003	200	Lucifer Yellow	0
P00015-T003-R000-S013	1296	(X)FG	P00015	T003	200	Lucifer Yellow	0
P00015-T003-R000-S013	1297	(X)FG	P00015	T003	200	Lucifer Yellow	0
P00015-T003-R000-S013	1298	(X)FG	P00015	T003	200	Lucifer Yellow	0
P00015-T003-R000-S013	1299	(X)FG	P00015	T003	200	Lucifer Yellow	0
P00015-T003-R000-S013	1300	(X)FG	P00015	T003	200	Lucifer Yellow	0
P00015-T003-R000-S013	1301	(X)FG	P00015	T003	200	Lucifer Yellow	0
P00015-T003-R000-S013	1302	(X)FG	P00015	T003	200	Lucifer Yellow	0
P00015-T003-R000-S013	1303	(X)FG	P00015	T003	200	Lucifer Yellow	0
P00015-T003-R000-S013	1304	(X)FG	P00015	T003	200	Lucifer Yellow	0
P00014-T001-R000-S034	1305	MFG.R	P00014	T001	200	Lucifer Yellow	0
P00014-T001-R000-S034	1307	MFG.R	P00014	T001	200	Lucifer Yellow	0
P00014-T001-R000-S034	1308	MFG.R	P00014	T001	200	Lucifer Yellow	0
P00014-T001-R000-S034	1309	MFG.R	P00014	T001	200	Lucifer Yellow	0
P00014-T001-R000-S034	1310	MFG.R	P00014	T001	200	Lucifer Yellow	0
P00014-T001-R000-S034	1311	MFG.R	P00014	T001	200	Lucifer Yellow	0
P00016-T001-R000-S020	1312	OL.L	P00016	T001	200	Lucifer Yellow	0
P00014-T001-R000-S017	1313	MFG.R	P00014	T001	200	Lucifer Yellow	0
P00014-T001-R000-S017	1314	MFG.R	P00014	T001	200	Lucifer Yellow	0
P00014-T001-R000-S017	1315	MFG.R	P00014	T001	200	Lucifer Yellow	0
P00014-T001-R000-S017	1316	MFG.R	P00014	T001	200	Lucifer Yellow	0
P00014-T001-R000-S017	1317	MFG.R	P00014	T001	200	Lucifer Yellow	0
P00014-T001-R000-S017	1318	MFG.R	P00014	T001	200	Lucifer Yellow	0
P00014-T001-R000-S017	1319	MFG.R	P00014	T001	200	Lucifer Yellow	0
P00014-T001-R000-S017	1320	MFG.R	P00014	T001	200	Lucifer Yellow	0
P00014-T001-R000-S017	1321	MFG.R	P00014	T001	200	Lucifer Yellow	0
P00014-T001-R000-S017	1322	MFG.R	P00014	T001	200	Lucifer Yellow	0
P00014-T001-R000-S032	1323	MFG.R	P00014	T001	200	Lucifer Yellow	0
P00014-T001-R000-S032	1324	MFG.R	P00014	T001	200	Lucifer Yellow	0
P00014-T001-R000-S032	1325	MFG.R	P00014	T001	200	Lucifer Yellow	0
P00014-T001-R000-S032	1326	MFG.R	P00014	T001	200	Lucifer Yellow	0
P00014-T001-R000-S032	1327	MFG.R	P00014	T001	200	Lucifer Yellow	0
P00014-T001-R000-S032	1328	MFG.R	P00014	T001	200	Lucifer Yellow	0
P00014-T001-R000-S032	1329	MFG.R	P00014	T001	200	Lucifer Yellow	0
P00014-T001-R000-S032	1330	MFG.R	P00014	T001	200	Lucifer Yellow	0
P00014-T001-R000-S033	1331	MFG.R	P00014	T001	200	Lucifer Yellow	0
P00014-T001-R000-S033	1332	MFG.R	P00014	T001	200	Lucifer Yellow	0
P00014-T001-R000-S033	1333	MFG.R	P00014	T001	200	Lucifer Yellow	0
P00015-T003-R000-S009	1334	(X)FG	P00015	T003	200	Lucifer Yellow	0
P00015-T003-R000-S009	1335	(X)FG	P00015	T003	200	Lucifer Yellow	0
P00015-T003-R000-S009	1336	(X)FG	P00015	T003	200	Lucifer Yellow	0
P00015-T003-R000-S009	1337	(X)FG	P00015	T003	200	Lucifer Yellow	0
P00014-T001-R000-S014	1338	MFG.R	P00014	T001	200	Lucifer Yellow	0
P00014-T001-R000-S014	1339	MFG.R	P00014	T001	200	Lucifer Yellow	0
P00014-T001-R000-S014	1340	MFG.R	P00014	T001	200	Lucifer Yellow	0
P00014-T001-R000-S014	1341	MFG.R	P00014	T001	200	Lucifer Yellow	0
P00014-T001-R000-S014	1342	MFG.R	P00014	T001	200	Lucifer Yellow	0
P00014-T001-R000-S014	1344	MFG.R	P00014	T001	200	Lucifer Yellow	0
P00008-T001-R000-S003	1346	PL.L	P00008	T001	200	Lucifer Yellow	0
P00008-T001-R000-S003	1347	PL.L	P00008	T001	200	Lucifer Yellow	0
P00008-T001-R000-S003	1348	PL.L	P00008	T001	200	Lucifer Yellow	0
P00014-T001-R000-S010	1350	MFG.R	P00014	T001	200	Lucifer Yellow	0
P00014-T001-R000-S010	1351	MFG.R	P00014	T001	200	Lucifer Yellow	0
P00014-T001-R000-S010	1352	MFG.R	P00014	T001	200	Lucifer Yellow	0
P00014-T001-R000-S010	1353	MFG.R	P00014	T001	200	Lucifer Yellow	0
P00014-T001-R000-S010	1354	MFG.R	P00014	T001	200	Lucifer Yellow	0
P00014-T001-R000-S010	1355	MFG.R	P00014	T001	200	Lucifer Yellow	0
P00014-T001-R000-S010	1356	MFG.R	P00014	T001	200	Lucifer Yellow	0
P00014-T001-R000-S010	1357	MFG.R	P00014	T001	200	Lucifer Yellow	0
P00014-T001-R000-S010	1358	MFG.R	P00014	T001	200	Lucifer Yellow	0
P00014-T001-R000-S010	1359	MFG.R	P00014	T001	200	Lucifer Yellow	0
P00014-T001-R000-S010	1360	MFG.R	P00014	T001	200	Lucifer Yellow	0
P00014-T001-R000-S010	1361	MFG.R	P00014	T001	200	Lucifer Yellow	0
P00014-T001-R000-S010	1362	MFG.R	P00014	T001	200	Lucifer Yellow	0
P00014-T001-R000-S010	1363	MFG.R	P00014	T001	200	Lucifer Yellow	0
P00014-T001-R000-S010	1364	MFG.R	P00014	T001	200	Lucifer Yellow	0
P00014-T001-R000-S010	1365	MFG.R	P00014	T001	200	Lucifer Yellow	0
P00014-T001-R000-S010	1366	MFG.R	P00014	T001	200	Lucifer Yellow	0
P00014-T001-R000-S010	1367	MFG.R	P00014	T001	200	Lucifer Yellow	0
P00014-T001-R000-S010	1368	MFG.R	P00014	T001	200	Lucifer Yellow	0
P00014-T001-R000-S010	1369	MFG.R	P00014	T001	200	Lucifer Yellow	0
P00014-T001-R000-S010	1370	MFG.R	P00014	T001	200	Lucifer Yellow	0
P00014-T001-R000-S010	1371	MFG.R	P00014	T001	200	Lucifer Yellow	0
P00014-T001-R000-S010	1372	MFG.R	P00014	T001	200	Lucifer Yellow	0
P00014-T001-R000-S010	1373	MFG.R	P00014	T001	200	Lucifer Yellow	0
P00014-T001-R000-S010	1374	MFG.R	P00014	T001	200	Lucifer Yellow	0
P00014-T001-R000-S006	1375	MFG.R	P00014	T001	200	Lucifer Yellow	0
P00014-T001-R000-S006	1376	MFG.R	P00014	T001	200	Lucifer Yellow	0
P00014-T001-R000-S006	1377	MFG.R	P00014	T001	200	Lucifer Yellow	0
P00014-T001-R000-S006	1378	MFG.R	P00014	T001	200	Lucifer Yellow	0
P00014-T001-R000-S006	1379	MFG.R	P00014	T001	200	Lucifer Yellow	0
P00014-T001-R000-S006	1380	MFG.R	P00014	T001	200	Lucifer Yellow	0
P00014-T001-R000-S006	1381	MFG.R	P00014	T001	200	Lucifer Yellow	0
P00014-T001-R000-S006	1382	MFG.R	P00014	T001	200	Lucifer Yellow	0
P00014-T001-R000-S006	1383	MFG.R	P00014	T001	200	Lucifer Yellow	0
P00014-T001-R000-S005	1384	MFG.R	P00014	T001	200	Lucifer Yellow	0
P00014-T001-R000-S005	1385	MFG.R	P00014	T001	200	Lucifer Yellow	0
P00014-T001-R000-S005	1386	MFG.R	P00014	T001	200	Lucifer Yellow	0
P00014-T001-R000-S005	1387	MFG.R	P00014	T001	200	Lucifer Yellow	0
P00014-T001-R000-S005	1389	MFG.R	P00014	T001	200	Lucifer Yellow	0
P00014-T001-R000-S005	1390	MFG.R	P00014	T001	200	Lucifer Yellow	0
P00014-T001-R000-S005	1391	MFG.R	P00014	T001	200	Lucifer Yellow	0
P00014-T001-R000-S005	1392	MFG.R	P00014	T001	200	Lucifer Yellow	0
P00014-T001-R000-S005	1393	MFG.R	P00014	T001	200	Lucifer Yellow	0
P00014-T001-R000-S005	1394	MFG.R	P00014	T001	200	Lucifer Yellow	0
P00014-T001-R000-S005	1395	MFG.R	P00014	T001	200	Lucifer Yellow	0
P00014-T001-R000-S005	1396	MFG.R	P00014	T001	200	Lucifer Yellow	0
P00014-T001-R000-S005	1397	MFG.R	P00014	T001	200	Lucifer Yellow	0
P00014-T001-R000-S005	1398	MFG.R	P00014	T001	200	Lucifer Yellow	0
P00014-T001-R000-S005	1399	MFG.R	P00014	T001	200	Lucifer Yellow	0
P00014-T001-R000-S005	1400	MFG.R	P00014	T001	200	Lucifer Yellow	0
P00014-T001-R000-S005	1401	MFG.R	P00014	T001	200	Lucifer Yellow	0
P00014-T001-R000-S005	1402	MFG.R	P00014	T001	200	Lucifer Yellow	0
P00014-T001-R000-S005	1403	MFG.R	P00014	T001	200	Lucifer Yellow	0
P00014-T001-R000-S005	1404	MFG.R	P00014	T001	200	Lucifer Yellow	0
P00014-T001-R000-S005	1405	MFG.R	P00014	T001	200	Lucifer Yellow	0
P00014-T001-R000-S005	1406	MFG.R	P00014	T001	200	Lucifer Yellow	0
P00014-T001-R000-S005	1407	MFG.R	P00014	T001	200	Lucifer Yellow	0
P00014-T001-R000-S037	1409	MFG.R	P00014	T001	200	Lucifer Yellow	0
P00014-T001-R000-S015	1410	MFG.R	P00014	T001	200	Lucifer Yellow	0
P00014-T001-R000-S015	1411	MFG.R	P00014	T001	200	Lucifer Yellow	0
P00014-T001-R000-S015	1412	MFG.R	P00014	T001	200	Lucifer Yellow	0
P00014-T001-R000-S015	1413	MFG.R	P00014	T001	200	Lucifer Yellow	0
P00014-T001-R000-S015	1414	MFG.R	P00014	T001	200	Lucifer Yellow	0
P00014-T001-R000-S015	1415	MFG.R	P00014	T001	200	Lucifer Yellow	0
P00014-T001-R000-S015	1416	MFG.R	P00014	T001	200	Lucifer Yellow	0
P00014-T001-R000-S015	1417	MFG.R	P00014	T001	200	Lucifer Yellow	0
P00014-T001-R000-S015	1418	MFG.R	P00014	T001	200	Lucifer Yellow	0
P00014-T001-R000-S015	1419	MFG.R	P00014	T001	200	Lucifer Yellow	0
P00014-T001-R000-S015	1420	MFG.R	P00014	T001	200	Lucifer Yellow	0
P00014-T001-R000-S015	1421	MFG.R	P00014	T001	200	Lucifer Yellow	0
P00014-T001-R000-S015	1422	MFG.R	P00014	T001	200	Lucifer Yellow	0
P00014-T001-R000-S015	1423	MFG.R	P00014	T001	200	Lucifer Yellow	0
P00014-T001-R000-S015	1425	MFG.R	P00014	T001	200	Lucifer Yellow	0
P00014-T001-R000-S015	1426	MFG.R	P00014	T001	200	Lucifer Yellow	0
P00014-T001-R000-S015	1427	MFG.R	P00014	T001	200	Lucifer Yellow	0
P00014-T001-R000-S015	1428	MFG.R	P00014	T001	200	Lucifer Yellow	0
P00014-T001-R000-S015	1430	MFG.R	P00014	T001	200	Lucifer Yellow	0
P00017-T001-R000-S014	1432	IFG.R	P00017	T001	200	Lucifer Yellow	0
P00014-T001-R000-S011	1434	MFG.R	P00014	T001	200	Lucifer Yellow	0
P00014-T001-R000-S011	1435	MFG.R	P00014	T001	200	Lucifer Yellow	0
P00014-T001-R000-S011	1436	MFG.R	P00014	T001	200	Lucifer Yellow	0
P00014-T001-R000-S011	1437	MFG.R	P00014	T001	200	Lucifer Yellow	0
P00014-T001-R000-S011	1438	MFG.R	P00014	T001	200	Lucifer Yellow	0
P00014-T001-R000-S011	1439	MFG.R	P00014	T001	200	Lucifer Yellow	0
P00014-T001-R000-S011	1440	MFG.R	P00014	T001	200	Lucifer Yellow	0
P00014-T001-R000-S011	1441	MFG.R	P00014	T001	200	Lucifer Yellow	0
P00014-T001-R000-S011	1442	MFG.R	P00014	T001	200	Lucifer Yellow	0
P00014-T001-R000-S011	1443	MFG.R	P00014	T001	200	Lucifer Yellow	0
P00014-T001-R000-S011	1444	MFG.R	P00014	T001	200	Lucifer Yellow	0
P00014-T001-R000-S011	1445	MFG.R	P00014	T001	200	Lucifer Yellow	0
P00014-T001-R000-S011	1446	MFG.R	P00014	T001	200	Lucifer Yellow	0
P00014-T001-R000-S011	1447	MFG.R	P00014	T001	200	Lucifer Yellow	0
P00014-T001-R000-S011	1448	MFG.R	P00014	T001	200	Lucifer Yellow	0
P00014-T001-R000-S011	1449	MFG.R	P00014	T001	200	Lucifer Yellow	0
P00014-T001-R000-S011	1450	MFG.R	P00014	T001	200	Lucifer Yellow	0
P00014-T001-R000-S011	1451	MFG.R	P00014	T001	200	Lucifer Yellow	0
P00014-T001-R000-S011	1452	MFG.R	P00014	T001	200	Lucifer Yellow	0
P00014-T001-R000-S011	1453	MFG.R	P00014	T001	200	Lucifer Yellow	0
P00014-T001-R000-S011	1454	MFG.R	P00014	T001	200	Lucifer Yellow	0
P00014-T001-R000-S011	1455	MFG.R	P00014	T001	200	Lucifer Yellow	0
P00014-T001-R000-S011	1456	MFG.R	P00014	T001	200	Lucifer Yellow	0
P00014-T001-R000-S011	1457	MFG.R	P00014	T001	200	Lucifer Yellow	0
P00014-T001-R000-S011	1458	MFG.R	P00014	T001	200	Lucifer Yellow	0
P00014-T001-R000-S011	1459	MFG.R	P00014	T001	200	Lucifer Yellow	0
P00014-T001-R000-S011	1460	MFG.R	P00014	T001	200	Lucifer Yellow	0
P00014-T001-R000-S011	1461	MFG.R	P00014	T001	200	Lucifer Yellow	0
P00014-T001-R000-S011	1462	MFG.R	P00014	T001	200	Lucifer Yellow	0
P00014-T001-R000-S011	1463	MFG.R	P00014	T001	200	Lucifer Yellow	0
P00014-T001-R000-S011	1464	MFG.R	P00014	T001	200	Lucifer Yellow	0
P00014-T001-R000-S011	1465	MFG.R	P00014	T001	200	Lucifer Yellow	0
P00014-T001-R000-S011	1466	MFG.R	P00014	T001	200	Lucifer Yellow	0
P00014-T001-R000-S004	1467	MFG.R	P00014	T001	200	Lucifer Yellow	0
P00014-T001-R000-S004	1468	MFG.R	P00014	T001	200	Lucifer Yellow	0
P00014-T001-R000-S004	1469	MFG.R	P00014	T001	200	Lucifer Yellow	0
P00014-T001-R000-S004	1470	MFG.R	P00014	T001	200	Lucifer Yellow	0
P00014-T001-R000-S004	1471	MFG.R	P00014	T001	200	Lucifer Yellow	0
P00014-T001-R000-S004	1472	MFG.R	P00014	T001	200	Lucifer Yellow	0
P00014-T001-R000-S004	1473	MFG.R	P00014	T001	200	Lucifer Yellow	0
P00014-T001-R000-S004	1474	MFG.R	P00014	T001	200	Lucifer Yellow	0
P00014-T001-R000-S004	1475	MFG.R	P00014	T001	200	Lucifer Yellow	0
P00014-T001-R000-S004	1476	MFG.R	P00014	T001	200	Lucifer Yellow	0
P00014-T001-R000-S004	1477	MFG.R	P00014	T001	200	Lucifer Yellow	0
P00014-T001-R000-S004	1478	MFG.R	P00014	T001	200	Lucifer Yellow	0
P00014-T001-R000-S004	1479	MFG.R	P00014	T001	200	Lucifer Yellow	0
P00014-T001-R000-S004	1480	MFG.R	P00014	T001	200	Lucifer Yellow	0
P00014-T001-R000-S004	1481	MFG.R	P00014	T001	200	Lucifer Yellow	0
P00014-T001-R000-S004	1482	MFG.R	P00014	T001	200	Lucifer Yellow	0
P00014-T001-R000-S004	1483	MFG.R	P00014	T001	200	Lucifer Yellow	0
P00014-T001-R000-S004	1484	MFG.R	P00014	T001	200	Lucifer Yellow	0
P00014-T001-R000-S004	1485	MFG.R	P00014	T001	200	Lucifer Yellow	0
P00014-T001-R000-S004	1487	MFG.R	P00014	T001	200	Lucifer Yellow	0
P00014-T001-R000-S004	1488	MFG.R	P00014	T001	200	Lucifer Yellow	0
P00014-T001-R000-S004	1489	MFG.R	P00014	T001	200	Lucifer Yellow	0
P00014-T001-R000-S008	1490	MFG.R	P00014	T001	200	Lucifer Yellow	0
P00014-T001-R000-S008	1491	MFG.R	P00014	T001	200	Lucifer Yellow	0
P00014-T001-R000-S008	1492	MFG.R	P00014	T001	200	Lucifer Yellow	0
P00014-T001-R000-S007	1493	MFG.R	P00014	T001	200	Lucifer Yellow	0
P00014-T001-R000-S007	1494	MFG.R	P00014	T001	200	Lucifer Yellow	0
P00014-T001-R000-S007	1495	MFG.R	P00014	T001	200	Lucifer Yellow	0
P00014-T001-R000-S007	1496	MFG.R	P00014	T001	200	Lucifer Yellow	0
P00014-T001-R000-S003	1498	MFG.R	P00014	T001	200	Lucifer Yellow	0
P00014-T001-R000-S003	1499	MFG.R	P00014	T001	200	Lucifer Yellow	0
P00014-T001-R000-S003	1500	MFG.R	P00014	T001	200	Lucifer Yellow	0
P00014-T001-R000-S003	1501	MFG.R	P00014	T001	200	Lucifer Yellow	0
P00014-T001-R000-S003	1502	MFG.R	P00014	T001	200	Lucifer Yellow	0
P00014-T001-R000-S018	1503	MFG.R	P00014	T001	200	Lucifer Yellow	0
P00014-T001-R000-S018	1504	MFG.R	P00014	T001	200	Lucifer Yellow	0
P00014-T001-R000-S018	1505	MFG.R	P00014	T001	200	Lucifer Yellow	0
P00014-T001-R000-S018	1506	MFG.R	P00014	T001	200	Lucifer Yellow	0
P00014-T001-R000-S018	1507	MFG.R	P00014	T001	200	Lucifer Yellow	0
P00014-T001-R000-S018	1508	MFG.R	P00014	T001	200	Lucifer Yellow	0
P00014-T001-R000-S018	1509	MFG.R	P00014	T001	200	Lucifer Yellow	0
P00014-T001-R000-S018	1510	MFG.R	P00014	T001	200	Lucifer Yellow	0
P00014-T001-R000-S018	1511	MFG.R	P00014	T001	200	Lucifer Yellow	0
P00014-T001-R000-S018	1512	MFG.R	P00014	T001	200	Lucifer Yellow	0
P00014-T001-R000-S018	1513	MFG.R	P00014	T001	200	Lucifer Yellow	0
P00014-T001-R000-S018	1514	MFG.R	P00014	T001	200	Lucifer Yellow	0
P00014-T001-R000-S018	1515	MFG.R	P00014	T001	200	Lucifer Yellow	0
P00014-T001-R000-S018	1516	MFG.R	P00014	T001	200	Lucifer Yellow	0
P00014-T001-R000-S018	1517	MFG.R	P00014	T001	200	Lucifer Yellow	0
P00014-T001-R000-S018	1518	MFG.R	P00014	T001	200	Lucifer Yellow	0
P00014-T001-R000-S018	1519	MFG.R	P00014	T001	200	Lucifer Yellow	0
P00014-T001-R000-S018	1520	MFG.R	P00014	T001	200	Lucifer Yellow	0
P00014-T001-R000-S018	1521	MFG.R	P00014	T001	200	Lucifer Yellow	0
P00014-T001-R000-S018	1522	MFG.R	P00014	T001	200	Lucifer Yellow	0
P00014-T001-R000-S018	1523	MFG.R	P00014	T001	200	Lucifer Yellow	0
P00014-T001-R000-S019	1524	MFG.R	P00014	T001	200	Lucifer Yellow	0
P00014-T001-R000-S019	1525	MFG.R	P00014	T001	200	Lucifer Yellow	0
P00014-T001-R000-S019	1526	MFG.R	P00014	T001	200	Lucifer Yellow	0
P00014-T001-R000-S019	1527	MFG.R	P00014	T001	200	Lucifer Yellow	0
P00014-T001-R000-S019	1528	MFG.R	P00014	T001	200	Lucifer Yellow	0
P00014-T001-R000-S019	1529	MFG.R	P00014	T001	200	Lucifer Yellow	0
P00014-T001-R000-S019	1530	MFG.R	P00014	T001	200	Lucifer Yellow	0
P00014-T001-R000-S019	1531	MFG.R	P00014	T001	200	Lucifer Yellow	0
P00018-T001-R000-S009	1532	PL.L	P00018	T001	200	Lucifer Yellow	0
P00018-T001-R000-S009	1533	PL.L	P00018	T001	200	Lucifer Yellow	0
P00018-T001-R000-S009	1534	PL.L	P00018	T001	200	Lucifer Yellow	0
P00018-T001-R000-S009	1535	PL.L	P00018	T001	200	Lucifer Yellow	0
P00018-T001-R000-S009	1536	PL.L	P00018	T001	200	Lucifer Yellow	0
P00018-T001-R000-S009	1537	PL.L	P00018	T001	200	Lucifer Yellow	0
P00018-T001-R000-S009	1538	PL.L	P00018	T001	200	Lucifer Yellow	0
P00018-T001-R000-S009	1539	PL.L	P00018	T001	200	Lucifer Yellow	0
P00018-T001-R000-S009	1540	PL.L	P00018	T001	200	Lucifer Yellow	0
P00018-T001-R000-S009	1541	PL.L	P00018	T001	200	Lucifer Yellow	0
P00018-T001-R000-S009	1542	PL.L	P00018	T001	200	Lucifer Yellow	0
P00018-T001-R000-S023	1543	PL.L	P00018	T001	200	Lucifer Yellow	0
P00018-T001-R000-S023	1544	PL.L	P00018	T001	200	Lucifer Yellow	0
P00018-T001-R000-S023	1545	PL.L	P00018	T001	200	Lucifer Yellow	0
P00018-T001-R000-S023	1546	PL.L	P00018	T001	200	Lucifer Yellow	0
P00018-T001-R000-S023	1547	PL.L	P00018	T001	200	Lucifer Yellow	0
P00018-T001-R000-S023	1548	PL.L	P00018	T001	200	Lucifer Yellow	0
P00018-T001-R000-S023	1549	PL.L	P00018	T001	200	Lucifer Yellow	0
P00018-T001-R000-S023	1550	PL.L	P00018	T001	200	Lucifer Yellow	0
P00018-T001-R000-S023	1551	PL.L	P00018	T001	200	Lucifer Yellow	0
P00018-T001-R000-S023	1552	PL.L	P00018	T001	200	Lucifer Yellow	0
P00018-T001-R000-S023	1553	PL.L	P00018	T001	200	Lucifer Yellow	0
P00018-T001-R000-S023	1554	PL.L	P00018	T001	200	Lucifer Yellow	0
P00018-T001-R000-S023	1555	PL.L	P00018	T001	200	Lucifer Yellow	0
P00018-T001-R000-S012	1556	PL.L	P00018	T001	200	Lucifer Yellow	0
P00018-T001-R000-S012	1557	PL.L	P00018	T001	200	Lucifer Yellow	0
P00018-T001-R000-S012	1558	PL.L	P00018	T001	200	Lucifer Yellow	0
P00018-T001-R000-S012	1559	PL.L	P00018	T001	200	Lucifer Yellow	0
P00018-T001-R000-S012	1560	PL.L	P00018	T001	200	Lucifer Yellow	0
P00018-T001-R000-S012	1561	PL.L	P00018	T001	200	Lucifer Yellow	0
P00018-T001-R000-S012	1562	PL.L	P00018	T001	200	Lucifer Yellow	0
P00018-T001-R000-S012	1563	PL.L	P00018	T001	200	Lucifer Yellow	0
P00018-T001-R000-S012	1564	PL.L	P00018	T001	200	Lucifer Yellow	0
P00018-T001-R000-S012	1566	PL.L	P00018	T001	200	Lucifer Yellow	0
P00018-T001-R000-S012	1567	PL.L	P00018	T001	200	Lucifer Yellow	0
P00018-T001-R000-S023	1568	PL.L	P00018	T001	200	Lucifer Yellow	0
P00018-T001-R000-S023	1569	PL.L	P00018	T001	200	Lucifer Yellow	0
P00018-T001-R000-S023	1570	PL.L	P00018	T001	200	Lucifer Yellow	0
P00018-T001-R000-S023	1571	PL.L	P00018	T001	200	Lucifer Yellow	0
P00018-T001-R000-S023	1572	PL.L	P00018	T001	200	Lucifer Yellow	0
P00018-T001-R000-S023	1573	PL.L	P00018	T001	200	Lucifer Yellow	0
P00019-T003-R000-S004	1574	SFG.R	P00019	T003	200	Lucifer Yellow	0
P00019-T003-R000-S004	1575	SFG.R	P00019	T003	200	Lucifer Yellow	0
P00019-T003-R000-S004	1576	SFG.R	P00019	T003	200	Lucifer Yellow	0
P00019-T003-R000-S004	1577	SFG.R	P00019	T003	200	Lucifer Yellow	0
P00019-T003-R000-S004	1578	SFG.R	P00019	T003	200	Lucifer Yellow	0
P00019-T003-R000-S004	1579	SFG.R	P00019	T003	200	Lucifer Yellow	0
P00019-T003-R000-S004	1580	SFG.R	P00019	T003	200	Lucifer Yellow	0
P00019-T003-R000-S004	1581	SFG.R	P00019	T003	200	Lucifer Yellow	0
P00018-T001-R000-S012	1582	PL.L	P00018	T001	200	Lucifer Yellow	0
P00018-T001-R000-S012	1583	PL.L	P00018	T001	200	Lucifer Yellow	0
P00018-T001-R000-S012	1584	PL.L	P00018	T001	200	Lucifer Yellow	0
P00018-T001-R000-S012	1585	PL.L	P00018	T001	200	Lucifer Yellow	0
P00018-T001-R000-S012	1586	PL.L	P00018	T001	200	Lucifer Yellow	0
P00018-T001-R000-S012	1587	PL.L	P00018	T001	200	Lucifer Yellow	0
P00018-T001-R000-S012	1588	PL.L	P00018	T001	200	Lucifer Yellow	0
P00018-T001-R000-S012	1589	PL.L	P00018	T001	200	Lucifer Yellow	0
P00018-T001-R000-S012	1590	PL.L	P00018	T001	200	Lucifer Yellow	0
P00018-T001-R000-S012	1591	PL.L	P00018	T001	200	Lucifer Yellow	0
P00018-T001-R000-S012	1592	PL.L	P00018	T001	200	Lucifer Yellow	0
P00018-T001-R000-S012	1593	PL.L	P00018	T001	200	Lucifer Yellow	0
P00018-T001-R000-S012	1594	PL.L	P00018	T001	200	Lucifer Yellow	0
P00018-T001-R000-S012	1595	PL.L	P00018	T001	200	Lucifer Yellow	0
P00018-T001-R000-S012	1596	PL.L	P00018	T001	200	Lucifer Yellow	0
P00018-T001-R000-S012	1597	PL.L	P00018	T001	200	Lucifer Yellow	0
P00018-T001-R000-S012	1598	PL.L	P00018	T001	200	Lucifer Yellow	0
P00018-T001-R000-S012	1599	PL.L	P00018	T001	200	Lucifer Yellow	0
P00018-T001-R000-S012	1600	PL.L	P00018	T001	200	Lucifer Yellow	0
P00018-T001-R000-S012	1601	PL.L	P00018	T001	200	Lucifer Yellow	0
P00018-T001-R000-S012	1602	PL.L	P00018	T001	200	Lucifer Yellow	0
P00018-T001-R000-S012	1603	PL.L	P00018	T001	200	Lucifer Yellow	0
P00018-T001-R000-S012	1604	PL.L	P00018	T001	200	Lucifer Yellow	0
P00018-T001-R000-S012	1605	PL.L	P00018	T001	200	Lucifer Yellow	0
P00018-T001-R000-S012	1606	PL.L	P00018	T001	200	Lucifer Yellow	0
P00018-T001-R000-S012	1607	PL.L	P00018	T001	200	Lucifer Yellow	0
P00018-T001-R000-S012	1608	PL.L	P00018	T001	200	Lucifer Yellow	0
P00018-T001-R000-S012	1609	PL.L	P00018	T001	200	Lucifer Yellow	0
P00018-T001-R000-S012	1610	PL.L	P00018	T001	200	Lucifer Yellow	0
P00018-T001-R000-S012	1611	PL.L	P00018	T001	200	Lucifer Yellow	0
P00018-T001-R000-S012	1612	PL.L	P00018	T001	200	Lucifer Yellow	0
P00018-T001-R000-S012	1613	PL.L	P00018	T001	200	Lucifer Yellow	0
P00018-T001-R000-S012	1614	PL.L	P00018	T001	200	Lucifer Yellow	0
P00018-T001-R000-S012	1615	PL.L	P00018	T001	200	Lucifer Yellow	0
P00018-T001-R000-S012	1616	PL.L	P00018	T001	200	Lucifer Yellow	0
P00014-T001-R000-S030	1617	MFG.R	P00014	T001	200	Lucifer Yellow	0
P00014-T001-R000-S030	1618	MFG.R	P00014	T001	200	Lucifer Yellow	0
P00014-T001-R000-S030	1619	MFG.R	P00014	T001	200	Lucifer Yellow	0
P00014-T001-R000-S030	1620	MFG.R	P00014	T001	200	Lucifer Yellow	0
P00014-T001-R000-S030	1621	MFG.R	P00014	T001	200	Lucifer Yellow	0
P00014-T001-R000-S030	1622	MFG.R	P00014	T001	200	Lucifer Yellow	0
P00014-T001-R000-S030	1623	MFG.R	P00014	T001	200	Lucifer Yellow	0
P00014-T001-R000-S029	1624	MFG.R	P00014	T001	200	Lucifer Yellow	0
P00014-T001-R000-S029	1625	MFG.R	P00014	T001	200	Lucifer Yellow	0
P00014-T001-R000-S029	1626	MFG.R	P00014	T001	200	Lucifer Yellow	0
P00014-T001-R000-S029	1627	MFG.R	P00014	T001	200	Lucifer Yellow	0
P00014-T001-R000-S029	1628	MFG.R	P00014	T001	200	Lucifer Yellow	0
P00014-T001-R000-S029	1629	MFG.R	P00014	T001	200	Lucifer Yellow	0
P00014-T001-R000-S029	1630	MFG.R	P00014	T001	200	Lucifer Yellow	0
P00018-T001-R000-S026	1631	PL.L	P00018	T001	200	Lucifer Yellow	0
P00018-T001-R000-S026	1632	PL.L	P00018	T001	200	Lucifer Yellow	0
P00018-T001-R000-S026	1633	PL.L	P00018	T001	200	Lucifer Yellow	0
P00018-T001-R000-S026	1634	PL.L	P00018	T001	200	Lucifer Yellow	0
P00018-T001-R000-S026	1635	PL.L	P00018	T001	200	Lucifer Yellow	0
P00018-T001-R000-S026	1636	PL.L	P00018	T001	200	Lucifer Yellow	0
P00018-T001-R000-S026	1638	PL.L	P00018	T001	200	Lucifer Yellow	0
P00018-T001-R000-S026	1639	PL.L	P00018	T001	200	Lucifer Yellow	0
P00018-T001-R000-S026	1640	PL.L	P00018	T001	200	Lucifer Yellow	0
P00018-T001-R000-S024	1641	PL.L	P00018	T001	200	Lucifer Yellow	0
P00018-T001-R000-S022	1642	PL.L	P00018	T001	200	Lucifer Yellow	0
P00018-T001-R000-S022	1643	PL.L	P00018	T001	200	Lucifer Yellow	0
P00018-T001-R000-S022	1644	PL.L	P00018	T001	200	Lucifer Yellow	0
P00018-T001-R000-S025	1645	PL.L	P00018	T001	200	Lucifer Yellow	0
P00018-T001-R000-S025	1646	PL.L	P00018	T001	200	Lucifer Yellow	0
P00018-T001-R000-S025	1647	PL.L	P00018	T001	200	Lucifer Yellow	0
P00018-T001-R000-S025	1648	PL.L	P00018	T001	200	Lucifer Yellow	0
P00018-T001-R000-S025	1649	PL.L	P00018	T001	200	Lucifer Yellow	0
P00018-T001-R000-S025	1650	PL.L	P00018	T001	200	Lucifer Yellow	0
P00018-T001-R000-S025	1651	PL.L	P00018	T001	200	Lucifer Yellow	0
P00018-T001-R000-S025	1652	PL.L	P00018	T001	200	Lucifer Yellow	0
P00018-T001-R000-S025	1653	PL.L	P00018	T001	200	Lucifer Yellow	0
P00018-T001-R000-S025	1654	PL.L	P00018	T001	200	Lucifer Yellow	0
P00018-T001-R000-S025	1655	PL.L	P00018	T001	200	Lucifer Yellow	0
P00018-T001-R000-S025	1656	PL.L	P00018	T001	200	Lucifer Yellow	0
P00018-T001-R000-S025	1657	PL.L	P00018	T001	200	Lucifer Yellow	0
P00018-T001-R000-S025	1658	PL.L	P00018	T001	200	Lucifer Yellow	0
P00018-T001-R000-S025	1659	PL.L	P00018	T001	200	Lucifer Yellow	0
P00018-T001-R000-S025	1660	PL.L	P00018	T001	200	Lucifer Yellow	0
P00018-T001-R000-S025	1661	PL.L	P00018	T001	200	Lucifer Yellow	0
P00018-T001-R000-S025	1662	PL.L	P00018	T001	200	Lucifer Yellow	0
P00018-T001-R000-S025	1663	PL.L	P00018	T001	200	Lucifer Yellow	0
P00018-T001-R000-S025	1664	PL.L	P00018	T001	200	Lucifer Yellow	0
P00018-T001-R000-S025	1665	PL.L	P00018	T001	200	Lucifer Yellow	0
P00018-T001-R000-S025	1666	PL.L	P00018	T001	200	Lucifer Yellow	0
P00018-T001-R000-S027	1667	PL.L	P00018	T001	200	Lucifer Yellow	0
P00018-T001-R000-S027	1668	PL.L	P00018	T001	200	Lucifer Yellow	0
P00018-T001-R000-S027	1669	PL.L	P00018	T001	200	Lucifer Yellow	0
P00018-T001-R000-S027	1670	PL.L	P00018	T001	200	Lucifer Yellow	0
P00018-T001-R000-S027	1671	PL.L	P00018	T001	200	Lucifer Yellow	0
P00018-T001-R000-S027	1672	PL.L	P00018	T001	200	Lucifer Yellow	0
P00018-T001-R000-S027	1673	PL.L	P00018	T001	200	Lucifer Yellow	0
P00018-T001-R000-S027	1674	PL.L	P00018	T001	200	Lucifer Yellow	0
P00018-T001-R000-S027	1675	PL.L	P00018	T001	200	Lucifer Yellow	0
P00018-T001-R000-S027	1676	PL.L	P00018	T001	200	Lucifer Yellow	0
P00018-T001-R000-S027	1677	PL.L	P00018	T001	200	Lucifer Yellow	0
P00018-T001-R000-S014	1678	PL.L	P00018	T001	200	Lucifer Yellow	0
P00018-T001-R000-S014	1679	PL.L	P00018	T001	200	Lucifer Yellow	0
P00018-T001-R000-S014	1680	PL.L	P00018	T001	200	Lucifer Yellow	0
P00018-T001-R000-S014	1681	PL.L	P00018	T001	200	Lucifer Yellow	0
P00018-T001-R000-S014	1682	PL.L	P00018	T001	200	Lucifer Yellow	0
P00018-T001-R000-S014	1683	PL.L	P00018	T001	200	Lucifer Yellow	0
P00018-T001-R000-S014	1684	PL.L	P00018	T001	200	Lucifer Yellow	0
P00018-T001-R000-S014	1686	PL.L	P00018	T001	200	Lucifer Yellow	0
P00018-T001-R000-S014	1687	PL.L	P00018	T001	200	Lucifer Yellow	0
P00018-T001-R000-S014	1688	PL.L	P00018	T001	200	Lucifer Yellow	0
P00018-T001-R000-S014	1689	PL.L	P00018	T001	200	Lucifer Yellow	0
P00018-T001-R000-S014	1690	PL.L	P00018	T001	200	Lucifer Yellow	0
P00018-T001-R000-S014	1691	PL.L	P00018	T001	200	Lucifer Yellow	0
P00018-T001-R000-S014	1692	PL.L	P00018	T001	200	Lucifer Yellow	0
P00018-T001-R000-S014	1693	PL.L	P00018	T001	200	Lucifer Yellow	0
P00018-T001-R000-S014	1694	PL.L	P00018	T001	200	Lucifer Yellow	0
P00018-T001-R000-S014	1695	PL.L	P00018	T001	200	Lucifer Yellow	0
P00018-T001-R000-S014	1696	PL.L	P00018	T001	200	Lucifer Yellow	0
P00018-T001-R000-S014	1697	PL.L	P00018	T001	200	Lucifer Yellow	0
P00018-T001-R000-S014	1698	PL.L	P00018	T001	200	Lucifer Yellow	0
P00018-T001-R000-S014	1699	PL.L	P00018	T001	200	Lucifer Yellow	0
P00018-T001-R000-S014	1700	PL.L	P00018	T001	200	Lucifer Yellow	0
P00018-T001-R000-S014	1701	PL.L	P00018	T001	200	Lucifer Yellow	0
P00018-T001-R000-S014	1702	PL.L	P00018	T001	200	Lucifer Yellow	0
P00018-T001-R000-S014	1703	PL.L	P00018	T001	200	Lucifer Yellow	0
P00018-T001-R000-S014	1704	PL.L	P00018	T001	200	Lucifer Yellow	0
P00018-T001-R000-S014	1706	PL.L	P00018	T001	200	Lucifer Yellow	0
P00018-T001-R000-S014	1707	PL.L	P00018	T001	200	Lucifer Yellow	0
P00018-T001-R000-S014	1708	PL.L	P00018	T001	200	Lucifer Yellow	0
P00018-T001-R000-S010	1709	PL.L	P00018	T001	200	Lucifer Yellow	0
P00018-T001-R000-S010	1710	PL.L	P00018	T001	200	Lucifer Yellow	0
P00018-T001-R000-S010	1711	PL.L	P00018	T001	200	Lucifer Yellow	0
P00018-T001-R000-S010	1712	PL.L	P00018	T001	200	Lucifer Yellow	0
P00018-T001-R000-S010	1713	PL.L	P00018	T001	200	Lucifer Yellow	0
P00018-T001-R000-S010	1714	PL.L	P00018	T001	200	Lucifer Yellow	0
P00018-T001-R000-S010	1715	PL.L	P00018	T001	200	Lucifer Yellow	0
P00018-T001-R000-S010	1716	PL.L	P00018	T001	200	Lucifer Yellow	0
P00018-T001-R000-S010	1717	PL.L	P00018	T001	200	Lucifer Yellow	0
P00018-T001-R000-S010	1718	PL.L	P00018	T001	200	Lucifer Yellow	0
P00018-T001-R000-S018	1719	PL.L	P00018	T001	200	Lucifer Yellow	0
P00018-T001-R000-S018	1720	PL.L	P00018	T001	200	Lucifer Yellow	0
P00018-T001-R000-S018	1721	PL.L	P00018	T001	200	Lucifer Yellow	0
P00018-T001-R000-S018	1722	PL.L	P00018	T001	200	Lucifer Yellow	0
P00018-T001-R000-S018	1723	PL.L	P00018	T001	200	Lucifer Yellow	0
P00018-T001-R000-S018	1724	PL.L	P00018	T001	200	Lucifer Yellow	0
P00018-T001-R000-S018	1725	PL.L	P00018	T001	200	Lucifer Yellow	0
P00018-T001-R000-S018	1726	PL.L	P00018	T001	200	Lucifer Yellow	0
P00018-T001-R000-S018	1727	PL.L	P00018	T001	200	Lucifer Yellow	0
P00018-T001-R000-S018	1728	PL.L	P00018	T001	200	Lucifer Yellow	0
P00018-T001-R000-S018	1729	PL.L	P00018	T001	200	Lucifer Yellow	0
P00018-T001-R000-S018	1730	PL.L	P00018	T001	200	Lucifer Yellow	0
P00018-T001-R000-S018	1731	PL.L	P00018	T001	200	Lucifer Yellow	0
P00018-T001-R000-S018	1732	PL.L	P00018	T001	200	Lucifer Yellow	0
P00018-T001-R000-S008	1734	PL.L	P00018	T001	200	Lucifer Yellow	0
P00018-T001-R000-S008	1735	PL.L	P00018	T001	200	Lucifer Yellow	0
P00018-T001-R000-S008	1736	PL.L	P00018	T001	200	Lucifer Yellow	0
P00018-T001-R000-S029	1738	PL.L	P00018	T001	200	Lucifer Yellow	0
P00018-T001-R000-S029	1741	PL.L	P00018	T001	200	Lucifer Yellow	0
P00018-T001-R000-S029	1743	PL.L	P00018	T001	200	Lucifer Yellow	0
P00018-T001-R000-S029	1744	PL.L	P00018	T001	200	Lucifer Yellow	0
P00018-T001-R000-S029	1745	PL.L	P00018	T001	200	Lucifer Yellow	0
P00020-T001-R000-S005	1747	OL.R	P00020	T001	200	Lucifer Yellow	0
P00020-T001-R000-S005	1748	OL.R	P00020	T001	200	Lucifer Yellow	0
P00020-T001-R000-S005	1749	OL.R	P00020	T001	200	Lucifer Yellow	0
P00020-T001-R000-S005	1750	OL.R	P00020	T001	200	Lucifer Yellow	0
P00020-T001-R000-S005	1751	OL.R	P00020	T001	200	Lucifer Yellow	0
P00020-T001-R000-S005	1752	OL.R	P00020	T001	200	Lucifer Yellow	0
P00020-T001-R000-S005	1753	OL.R	P00020	T001	200	Lucifer Yellow	0
P00020-T001-R000-S004	1754	OL.R	P00020	T001	200	Lucifer Yellow	0
P00020-T001-R000-S004	1755	OL.R	P00020	T001	200	Lucifer Yellow	0
P00020-T001-R000-S004	1756	OL.R	P00020	T001	200	Lucifer Yellow	0
P00020-T001-R000-S006	1757	OL.R	P00020	T001	200	Lucifer Yellow	0
P00020-T001-R000-S006	1758	OL.R	P00020	T001	200	Lucifer Yellow	0
P00020-T001-R000-S006	1759	OL.R	P00020	T001	200	Lucifer Yellow	0
P00020-T001-R000-S006	1760	OL.R	P00020	T001	200	Lucifer Yellow	0
P00020-T001-R000-S006	1761	OL.R	P00020	T001	200	Lucifer Yellow	0
P00020-T001-R000-S006	1762	OL.R	P00020	T001	200	Lucifer Yellow	0
P00020-T001-R000-S006	1763	OL.R	P00020	T001	200	Lucifer Yellow	0
P00020-T001-R000-S006	1764	OL.R	P00020	T001	200	Lucifer Yellow	0
P00020-T001-R000-S006	1765	OL.R	P00020	T001	200	Lucifer Yellow	0
P00020-T001-R000-S006	1766	OL.R	P00020	T001	200	Lucifer Yellow	0
P00020-T001-R000-S006	1767	OL.R	P00020	T001	200	Lucifer Yellow	0
P00020-T001-R000-S006	1768	OL.R	P00020	T001	200	Lucifer Yellow	0
P00020-T001-R000-S006	1769	OL.R	P00020	T001	200	Lucifer Yellow	0
P00020-T001-R000-S006	1770	OL.R	P00020	T001	200	Lucifer Yellow	0
P00020-T001-R000-S006	1771	OL.R	P00020	T001	200	Lucifer Yellow	0
P00020-T001-R000-S006	1772	OL.R	P00020	T001	200	Lucifer Yellow	0
P00020-T001-R000-S006	1773	OL.R	P00020	T001	200	Lucifer Yellow	0
P00020-T002-R000-S001	1774	OL.R	P00020	T002	300	Lucifer Yellow	0
P00020-T002-R000-S001	1775	OL.R	P00020	T002	300	Lucifer Yellow	0
P00020-T002-R000-S001	1776	OL.R	P00020	T002	300	Lucifer Yellow	0
P00020-T002-R000-S001	1777	OL.R	P00020	T002	300	Lucifer Yellow	0
P00020-T002-R000-S001	1778	OL.R	P00020	T002	300	Lucifer Yellow	0
P00020-T002-R000-S001	1779	OL.R	P00020	T002	300	Lucifer Yellow	0
P00020-T002-R000-S001	1780	OL.R	P00020	T002	300	Lucifer Yellow	0
P00020-T002-R000-S001	1781	OL.R	P00020	T002	300	Lucifer Yellow	0
P00020-T001-R000-S004	1782	OL.R	P00020	T001	200	Lucifer Yellow	0
P00020-T001-R000-S004	1783	OL.R	P00020	T001	200	Lucifer Yellow	0
P00020-T001-R000-S004	1784	OL.R	P00020	T001	200	Lucifer Yellow	0
P00020-T001-R000-S004	1785	OL.R	P00020	T001	200	Lucifer Yellow	0
P00020-T001-R000-S004	1786	OL.R	P00020	T001	200	Lucifer Yellow	0
P00020-T001-R000-S004	1787	OL.R	P00020	T001	200	Lucifer Yellow	0
P00020-T001-R000-S015	1788	OL.R	P00020	T001	200	Lucifer Yellow	0
P00020-T001-R000-S015	1789	OL.R	P00020	T001	200	Lucifer Yellow	0
P00020-T001-R000-S015	1790	OL.R	P00020	T001	200	Lucifer Yellow	0
P00020-T001-R000-S015	1791	OL.R	P00020	T001	200	Lucifer Yellow	0
P00020-T001-R000-S015	1792	OL.R	P00020	T001	200	Lucifer Yellow	0
P00020-T001-R000-S015	1793	OL.R	P00020	T001	200	Lucifer Yellow	0
P00020-T001-R000-S015	1794	OL.R	P00020	T001	200	Lucifer Yellow	0
P00020-T001-R000-S015	1795	OL.R	P00020	T001	200	Lucifer Yellow	0
P00020-T001-R000-S015	1796	OL.R	P00020	T001	200	Lucifer Yellow	0
P00020-T001-R000-S015	1797	OL.R	P00020	T001	200	Lucifer Yellow	0
P00020-T001-R000-S007	1798	OL.R	P00020	T001	200	Lucifer Yellow	0
P00020-T001-R000-S007	1799	OL.R	P00020	T001	200	Lucifer Yellow	0
P00020-T001-R000-S007	1800	OL.R	P00020	T001	200	Lucifer Yellow	0
P00020-T001-R000-S007	1801	OL.R	P00020	T001	200	Lucifer Yellow	0
P00020-T001-R000-S007	1802	OL.R	P00020	T001	200	Lucifer Yellow	0
P00021-T001-R000-S030	1803	FL.R	P00021	T001	300	Lucifer Yellow	0
P00021-T001-R000-S030	1804	FL.R	P00021	T001	300	Lucifer Yellow	0
P00020-T001-R000-S016	1805	OL.R	P00020	T001	200	Lucifer Yellow	0
P00020-T001-R000-S016	1806	OL.R	P00020	T001	200	Lucifer Yellow	0
P00020-T001-R000-S016	1807	OL.R	P00020	T001	200	Lucifer Yellow	0
P00020-T001-R000-S016	1808	OL.R	P00020	T001	200	Lucifer Yellow	0
P00020-T001-R000-S008	1809	OL.R	P00020	T001	200	Lucifer Yellow	0
P00020-T001-R000-S008	1810	OL.R	P00020	T001	200	Lucifer Yellow	0
P00020-T001-R000-S008	1811	OL.R	P00020	T001	200	Lucifer Yellow	0
P00020-T001-R000-S008	1812	OL.R	P00020	T001	200	Lucifer Yellow	0
P00020-T001-R000-S008	1813	OL.R	P00020	T001	200	Lucifer Yellow	0
P00020-T001-R000-S008	1814	OL.R	P00020	T001	200	Lucifer Yellow	0
P00020-T001-R000-S008	1815	OL.R	P00020	T001	200	Lucifer Yellow	0
P00020-T001-R000-S008	1816	OL.R	P00020	T001	200	Lucifer Yellow	0
P00020-T001-R000-S008	1817	OL.R	P00020	T001	200	Lucifer Yellow	0
P00020-T001-R000-S011	1818	OL.R	P00020	T001	200	Lucifer Yellow	0
P00020-T001-R000-S011	1819	OL.R	P00020	T001	200	Lucifer Yellow	0
P00020-T001-R000-S011	1820	OL.R	P00020	T001	200	Lucifer Yellow	0
P00020-T001-R000-S011	1821	OL.R	P00020	T001	200	Lucifer Yellow	0
P00020-T001-R000-S011	1822	OL.R	P00020	T001	200	Lucifer Yellow	0
P00020-T001-R000-S011	1823	OL.R	P00020	T001	200	Lucifer Yellow	0
P00020-T001-R000-S032	1824	OL.R	P00020	T001	200	Lucifer Yellow	0
P00020-T001-R000-S032	1825	OL.R	P00020	T001	200	Lucifer Yellow	0
P00020-T001-R000-S032	1826	OL.R	P00020	T001	200	Lucifer Yellow	0
P00020-T001-R000-S032	1827	OL.R	P00020	T001	200	Lucifer Yellow	0
P00020-T001-R000-S032	1828	OL.R	P00020	T001	200	Lucifer Yellow	0
P00020-T001-R000-S032	1829	OL.R	P00020	T001	200	Lucifer Yellow	0
P00020-T001-R000-S032	1830	OL.R	P00020	T001	200	Lucifer Yellow	0
P00020-T001-R000-S032	1831	OL.R	P00020	T001	200	Lucifer Yellow	0
P00020-T001-R000-S032	1832	OL.R	P00020	T001	200	Lucifer Yellow	0
P00020-T001-R000-S032	1833	OL.R	P00020	T001	200	Lucifer Yellow	0
P00020-T001-R000-S012	1834	OL.R	P00020	T001	200	Lucifer Yellow	0
P00020-T001-R000-S012	1835	OL.R	P00020	T001	200	Lucifer Yellow	0
P00020-T001-R000-S012	1836	OL.R	P00020	T001	200	Lucifer Yellow	0
P00020-T001-R000-S012	1837	OL.R	P00020	T001	200	Lucifer Yellow	0
P00020-T001-R000-S012	1838	OL.R	P00020	T001	200	Lucifer Yellow	0
P00020-T001-R000-S012	1839	OL.R	P00020	T001	200	Lucifer Yellow	0
P00020-T001-R000-S012	1840	OL.R	P00020	T001	200	Lucifer Yellow	0
P00020-T001-R000-S012	1841	OL.R	P00020	T001	200	Lucifer Yellow	0
P00020-T001-R000-S012	1842	OL.R	P00020	T001	200	Lucifer Yellow	0
P00020-T001-R000-S032	1843	OL.R	P00020	T001	200	Lucifer Yellow	0
P00020-T001-R000-S032	1844	OL.R	P00020	T001	200	Lucifer Yellow	0
P00020-T001-R000-S032	1845	OL.R	P00020	T001	200	Lucifer Yellow	0
P00020-T001-R000-S032	1846	OL.R	P00020	T001	200	Lucifer Yellow	0
P00020-T001-R000-S032	1847	OL.R	P00020	T001	200	Lucifer Yellow	0
P00020-T001-R000-S032	1848	OL.R	P00020	T001	200	Lucifer Yellow	0
P00020-T001-R000-S032	1849	OL.R	P00020	T001	200	Lucifer Yellow	0
P00020-T001-R000-S032	1850	OL.R	P00020	T001	200	Lucifer Yellow	0
P00020-T001-R000-S032	1851	OL.R	P00020	T001	200	Lucifer Yellow	0
P00020-T001-R000-S032	1852	OL.R	P00020	T001	200	Lucifer Yellow	0
P00020-T001-R000-S032	1853	OL.R	P00020	T001	200	Lucifer Yellow	0
P00020-T001-R000-S032	1854	OL.R	P00020	T001	200	Lucifer Yellow	0
P00020-T001-R000-S032	1855	OL.R	P00020	T001	200	Lucifer Yellow	0
P00020-T001-R000-S032	1856	OL.R	P00020	T001	200	Lucifer Yellow	0
P00020-T001-R000-S016	1857	OL.R	P00020	T001	200	Lucifer Yellow	0
P00020-T001-R000-S016	1858	OL.R	P00020	T001	200	Lucifer Yellow	0
P00020-T001-R000-S016	1859	OL.R	P00020	T001	200	Lucifer Yellow	0
P00020-T001-R000-S016	1860	OL.R	P00020	T001	200	Lucifer Yellow	0
P00020-T001-R000-S030	1861	OL.R	P00020	T001	200	Lucifer Yellow	0
P00020-T001-R000-S030	1862	OL.R	P00020	T001	200	Lucifer Yellow	0
P00020-T001-R000-S030	1863	OL.R	P00020	T001	200	Lucifer Yellow	0
P00020-T001-R000-S030	1864	OL.R	P00020	T001	200	Lucifer Yellow	0
P00020-T001-R000-S030	1865	OL.R	P00020	T001	200	Lucifer Yellow	0
P00020-T001-R000-S030	1866	OL.R	P00020	T001	200	Lucifer Yellow	0
P00020-T001-R000-S030	1867	OL.R	P00020	T001	200	Lucifer Yellow	0
P00020-T001-R000-S030	1868	OL.R	P00020	T001	200	Lucifer Yellow	0
P00020-T001-R000-S030	1869	OL.R	P00020	T001	200	Lucifer Yellow	0
P00020-T001-R000-S030	1870	OL.R	P00020	T001	200	Lucifer Yellow	0
P00020-T001-R000-S030	1871	OL.R	P00020	T001	200	Lucifer Yellow	0
P00020-T001-R000-S030	1872	OL.R	P00020	T001	200	Lucifer Yellow	0
P00020-T001-R000-S030	1873	OL.R	P00020	T001	200	Lucifer Yellow	0
P00020-T001-R000-S030	1874	OL.R	P00020	T001	200	Lucifer Yellow	0
P00020-T001-R000-S030	1875	OL.R	P00020	T001	200	Lucifer Yellow	0
P00020-T001-R000-S030	1876	OL.R	P00020	T001	200	Lucifer Yellow	0
P00020-T001-R000-S030	1877	OL.R	P00020	T001	200	Lucifer Yellow	0
P00020-T001-R000-S030	1878	OL.R	P00020	T001	200	Lucifer Yellow	0
P00020-T001-R000-S030	1879	OL.R	P00020	T001	200	Lucifer Yellow	0
P00020-T001-R000-S030	1880	OL.R	P00020	T001	200	Lucifer Yellow	0
P00021-T001-R000-S022	1881	FL.R	P00021	T001	250	Lucifer Yellow	0
P00021-T001-R000-S022	1882	FL.R	P00021	T001	250	Lucifer Yellow	0
P00021-T001-R000-S022	1883	FL.R	P00021	T001	250	Lucifer Yellow	0
P00021-T001-R000-S022	1884	FL.R	P00021	T001	250	Lucifer Yellow	0
P00021-T001-R000-S022	1885	FL.R	P00021	T001	250	Lucifer Yellow	0
P00021-T001-R000-S022	1886	FL.R	P00021	T001	250	Lucifer Yellow	0
P00021-T001-R000-S022	1887	FL.R	P00021	T001	250	Lucifer Yellow	0
P00021-T001-R000-S022	1888	FL.R	P00021	T001	250	Lucifer Yellow	0
P00021-T001-R000-S015	1889	FL.R	P00021	T001	250	Lucifer Yellow	0
P00021-T001-R000-S015	1890	FL.R	P00021	T001	250	Lucifer Yellow	0
P00021-T001-R000-S015	1891	FL.R	P00021	T001	250	Lucifer Yellow	0
P00021-T001-R000-S015	1892	FL.R	P00021	T001	250	Lucifer Yellow	0
P00021-T001-R000-S015	1893	FL.R	P00021	T001	250	Lucifer Yellow	0
P00021-T001-R000-S015	1894	FL.R	P00021	T001	250	Lucifer Yellow	0
P00021-T001-R000-S015	1895	FL.R	P00021	T001	250	Lucifer Yellow	0
P00021-T001-R000-S015	1896	FL.R	P00021	T001	250	Lucifer Yellow	0
P00021-T001-R000-S015	1897	FL.R	P00021	T001	250	Lucifer Yellow	0
P00021-T001-R000-S015	1898	FL.R	P00021	T001	250	Lucifer Yellow	0
P00021-T001-R000-S023	1899	FL.R	P00021	T001	250	Lucifer Yellow	0
P00021-T001-R000-S023	1900	FL.R	P00021	T001	250	Lucifer Yellow	0
P00021-T001-R000-S023	1901	FL.R	P00021	T001	250	Lucifer Yellow	0
P00021-T001-R000-S023	1902	FL.R	P00021	T001	250	Lucifer Yellow	0
P00021-T001-R000-S023	1903	FL.R	P00021	T001	250	Lucifer Yellow	0
P00021-T001-R000-S023	1904	FL.R	P00021	T001	250	Lucifer Yellow	0
P00021-T001-R000-S023	1905	FL.R	P00021	T001	250	Lucifer Yellow	0
P00021-T001-R000-S023	1906	FL.R	P00021	T001	250	Lucifer Yellow	0
P00021-T001-R000-S023	1907	FL.R	P00021	T001	250	Lucifer Yellow	0
P00021-T001-R000-S023	1908	FL.R	P00021	T001	250	Lucifer Yellow	0
P00021-T001-R000-S023	1909	FL.R	P00021	T001	250	Lucifer Yellow	0
P00021-T001-R000-S023	1910	FL.R	P00021	T001	250	Lucifer Yellow	0
P00020-T001-R000-S036	1911	OL.R	P00020	T001	200	Lucifer Yellow	0
P00020-T001-R000-S036	1912	OL.R	P00020	T001	200	Lucifer Yellow	0
P00020-T001-R000-S036	1913	OL.R	P00020	T001	200	Lucifer Yellow	0
P00020-T001-R000-S036	1914	OL.R	P00020	T001	200	Lucifer Yellow	0
P00020-T001-R000-S039	1915	OL.R	P00020	T001	200	Lucifer Yellow	0
P00020-T001-R000-S039	1916	OL.R	P00020	T001	200	Lucifer Yellow	0
P00020-T001-R000-S039	1917	OL.R	P00020	T001	200	Lucifer Yellow	0
P00020-T001-R000-S039	1918	OL.R	P00020	T001	200	Lucifer Yellow	0
P00020-T001-R000-S039	1919	OL.R	P00020	T001	200	Lucifer Yellow	0
P00020-T001-R000-S039	1920	OL.R	P00020	T001	200	Lucifer Yellow	0
P00020-T001-R000-S039	1921	OL.R	P00020	T001	200	Lucifer Yellow	0
P00020-T001-R000-S039	1922	OL.R	P00020	T001	200	Lucifer Yellow	0
P00020-T001-R000-S039	1923	OL.R	P00020	T001	200	Lucifer Yellow	0
P00020-T001-R000-S039	1924	OL.R	P00020	T001	200	Lucifer Yellow	0
P00020-T001-R000-S012	1926	OL.R	P00020	T001	200	Lucifer Yellow	0
P00021-T001-R000-S043	1927	FL.R	P00021	T001	200	Lucifer Yellow	0
P00021-T001-R000-S043	1928	FL.R	P00021	T001	200	Lucifer Yellow	0
P00021-T001-R000-S043	1929	FL.R	P00021	T001	200	Lucifer Yellow	0
P00021-T001-R000-S043	1930	FL.R	P00021	T001	200	Lucifer Yellow	0
P00021-T001-R000-S043	1931	FL.R	P00021	T001	200	Lucifer Yellow	0
P00021-T001-R000-S043	1932	FL.R	P00021	T001	200	Lucifer Yellow	0
P00021-T001-R000-S043	1933	FL.R	P00021	T001	200	Lucifer Yellow	0
P00021-T001-R000-S043	1934	FL.R	P00021	T001	200	Lucifer Yellow	0
P00021-T001-R000-S043	1935	FL.R	P00021	T001	200	Lucifer Yellow	0
P00021-T001-R000-S043	1936	FL.R	P00021	T001	200	Lucifer Yellow	0
P00021-T001-R000-S043	1937	FL.R	P00021	T001	200	Lucifer Yellow	0
P00021-T001-R000-S043	1938	FL.R	P00021	T001	200	Lucifer Yellow	0
P00021-T001-R000-S043	1939	FL.R	P00021	T001	200	Lucifer Yellow	0
P00021-T001-R000-S017	1940	FL.R	P00021	T001	250	Lucifer Yellow	0
P00021-T001-R000-S017	1941	FL.R	P00021	T001	250	Lucifer Yellow	0
P00021-T001-R000-S017	1942	FL.R	P00021	T001	250	Lucifer Yellow	0
P00021-T001-R000-S017	1943	FL.R	P00021	T001	250	Lucifer Yellow	0
P00021-T001-R000-S017	1944	FL.R	P00021	T001	250	Lucifer Yellow	0
P00021-T001-R000-S017	1945	FL.R	P00021	T001	250	Lucifer Yellow	0
P00021-T001-R000-S017	1946	FL.R	P00021	T001	250	Lucifer Yellow	0
P00021-T001-R000-S017	1947	FL.R	P00021	T001	250	Lucifer Yellow	0
P00021-T001-R000-S017	1948	FL.R	P00021	T001	250	Lucifer Yellow	0
P00021-T001-R000-S017	1949	FL.R	P00021	T001	250	Lucifer Yellow	0
P00021-T001-R000-S017	1950	FL.R	P00021	T001	250	Lucifer Yellow	0
P00021-T001-R000-S017	1951	FL.R	P00021	T001	250	Lucifer Yellow	0
P00021-T001-R000-S017	1952	FL.R	P00021	T001	250	Lucifer Yellow	0
P00021-T001-R000-S017	1953	FL.R	P00021	T001	250	Lucifer Yellow	0
P00021-T001-R000-S017	1954	FL.R	P00021	T001	250	Lucifer Yellow	0
P00021-T001-R000-S017	1955	FL.R	P00021	T001	250	Lucifer Yellow	0
P00021-T001-R000-S017	1956	FL.R	P00021	T001	250	Lucifer Yellow	0
P00021-T001-R000-S017	1957	FL.R	P00021	T001	250	Lucifer Yellow	0
P00021-T001-R000-S017	1958	FL.R	P00021	T001	250	Lucifer Yellow	0
P00021-T001-R000-S017	1959	FL.R	P00021	T001	250	Lucifer Yellow	0
P00021-T001-R000-S017	1960	FL.R	P00021	T001	250	Lucifer Yellow	0
P00021-T001-R000-S017	1961	FL.R	P00021	T001	250	Lucifer Yellow	0
P00020-T001-R000-S035	1962	OL.R	P00020	T001	200	Lucifer Yellow	0
P00020-T001-R000-S035	1963	OL.R	P00020	T001	200	Lucifer Yellow	0
P00020-T001-R000-S035	1964	OL.R	P00020	T001	200	Lucifer Yellow	0
P00020-T001-R000-S035	1965	OL.R	P00020	T001	200	Lucifer Yellow	0
P00020-T001-R000-S035	1966	OL.R	P00020	T001	200	Lucifer Yellow	0
P00020-T001-R000-S035	1967	OL.R	P00020	T001	200	Lucifer Yellow	0
P00020-T001-R000-S035	1968	OL.R	P00020	T001	200	Lucifer Yellow	0
P00020-T001-R000-S035	1969	OL.R	P00020	T001	200	Lucifer Yellow	0
P00020-T001-R000-S035	1970	OL.R	P00020	T001	200	Lucifer Yellow	0
P00020-T001-R000-S035	1971	OL.R	P00020	T001	200	Lucifer Yellow	0
P00020-T001-R000-S035	1972	OL.R	P00020	T001	200	Lucifer Yellow	0
P00020-T001-R000-S035	1973	OL.R	P00020	T001	200	Lucifer Yellow	0
P00021-T001-R000-S043	1974	FL.R	P00021	T001	200	Lucifer Yellow	0
P00021-T001-R000-S043	1975	FL.R	P00021	T001	200	Lucifer Yellow	0
P00021-T001-R000-S025	1976	FL.R	P00021	T001	250	Lucifer Yellow	0
P00021-T001-R000-S025	1977	FL.R	P00021	T001	250	Lucifer Yellow	0
P00021-T001-R000-S025	1978	FL.R	P00021	T001	250	Lucifer Yellow	0
P00021-T001-R000-S025	1979	FL.R	P00021	T001	250	Lucifer Yellow	0
P00021-T001-R000-S025	1980	FL.R	P00021	T001	250	Lucifer Yellow	0
P00020-T001-R000-S022	1981	OL.R	P00020	T001	200	Lucifer Yellow	0
P00020-T001-R000-S022	1982	OL.R	P00020	T001	200	Lucifer Yellow	0
P00020-T001-R000-S022	1983	OL.R	P00020	T001	200	Lucifer Yellow	0
P00020-T001-R000-S022	1984	OL.R	P00020	T001	200	Lucifer Yellow	0
P00020-T001-R000-S022	1985	OL.R	P00020	T001	200	Lucifer Yellow	0
P00020-T001-R000-S022	1986	OL.R	P00020	T001	200	Lucifer Yellow	0
P00020-T001-R000-S022	1987	OL.R	P00020	T001	200	Lucifer Yellow	0
P00020-T001-R000-S022	1988	OL.R	P00020	T001	200	Lucifer Yellow	0
P00020-T001-R000-S022	1989	OL.R	P00020	T001	200	Lucifer Yellow	0
P00020-T001-R000-S022	1990	OL.R	P00020	T001	200	Lucifer Yellow	0
P00020-T001-R000-S022	1991	OL.R	P00020	T001	200	Lucifer Yellow	0
P00020-T001-R000-S022	1992	OL.R	P00020	T001	200	Lucifer Yellow	0
P00020-T001-R000-S022	1993	OL.R	P00020	T001	200	Lucifer Yellow	0
P00020-T001-R000-S018	1994	OL.R	P00020	T001	200	Lucifer Yellow	0
P00020-T001-R000-S018	1995	OL.R	P00020	T001	200	Lucifer Yellow	0
P00020-T001-R000-S018	1996	OL.R	P00020	T001	200	Lucifer Yellow	0
P00021-T001-R000-S014	1997	FL.R	P00021	T001	250	Lucifer Yellow	0
P00021-T001-R000-S014	1998	FL.R	P00021	T001	250	Lucifer Yellow	0
P00021-T001-R000-S014	1999	FL.R	P00021	T001	250	Lucifer Yellow	0
P00021-T001-R000-S014	2000	FL.R	P00021	T001	250	Lucifer Yellow	0
P00022-T002-R000-S030	2001	TP.L	P00022	T002	250	Lucifer Yellow	0
P00022-T002-R000-S030	2002	TP.L	P00022	T002	250	Lucifer Yellow	0
P00022-T002-R000-S030	2005	TP.L	P00022	T002	250	Lucifer Yellow	0
P00022-T002-R000-S030	2006	TP.L	P00022	T002	250	Lucifer Yellow	0
P00020-T001-R000-S028	2007	OL.R	P00020	T001	200	Lucifer Yellow	0
P00020-T001-R000-S028	2008	OL.R	P00020	T001	200	Lucifer Yellow	0
P00020-T001-R000-S028	2009	OL.R	P00020	T001	200	Lucifer Yellow	0
P00020-T001-R000-S028	2010	OL.R	P00020	T001	200	Lucifer Yellow	0
P00020-T001-R000-S028	2011	OL.R	P00020	T001	200	Lucifer Yellow	0
P00020-T001-R000-S028	2012	OL.R	P00020	T001	200	Lucifer Yellow	0
P00020-T001-R000-S028	2013	OL.R	P00020	T001	200	Lucifer Yellow	0
P00020-T001-R000-S028	2014	OL.R	P00020	T001	200	Lucifer Yellow	0
P00020-T001-R000-S028	2015	OL.R	P00020	T001	200	Lucifer Yellow	0
P00020-T001-R000-S028	2016	OL.R	P00020	T001	200	Lucifer Yellow	0
P00020-T001-R000-S028	2017	OL.R	P00020	T001	200	Lucifer Yellow	0
P00020-T001-R000-S028	2018	OL.R	P00020	T001	200	Lucifer Yellow	0
P00020-T001-R000-S028	2019	OL.R	P00020	T001	200	Lucifer Yellow	0
P00020-T001-R000-S028	2020	OL.R	P00020	T001	200	Lucifer Yellow	0
P00020-T001-R000-S028	2021	OL.R	P00020	T001	200	Lucifer Yellow	0
P00020-T001-R000-S028	2022	OL.R	P00020	T001	200	Lucifer Yellow	0
P00020-T001-R000-S028	2023	OL.R	P00020	T001	200	Lucifer Yellow	0
P00020-T001-R000-S028	2024	OL.R	P00020	T001	200	Lucifer Yellow	0
P00020-T001-R000-S028	2025	OL.R	P00020	T001	200	Lucifer Yellow	0
P00020-T001-R000-S028	2027	OL.R	P00020	T001	200	Lucifer Yellow	0
P00021-T001-R000-S045	2028	FL.R	P00021	T001	200	Lucifer Yellow	0
P00021-T001-R000-S045	2029	FL.R	P00021	T001	200	Lucifer Yellow	0
P00021-T001-R000-S045	2030	FL.R	P00021	T001	200	Lucifer Yellow	0
P00021-T001-R000-S025	2031	FL.R	P00021	T001	250	Lucifer Yellow	0
P00021-T001-R000-S025	2032	FL.R	P00021	T001	250	Lucifer Yellow	0
P00021-T001-R000-S025	2033	FL.R	P00021	T001	250	Lucifer Yellow	0
P00021-T001-R000-S025	2034	FL.R	P00021	T001	250	Lucifer Yellow	0
P00021-T001-R000-S025	2035	FL.R	P00021	T001	250	Lucifer Yellow	0
P00021-T001-R000-S025	2036	FL.R	P00021	T001	250	Lucifer Yellow	0
P00021-T001-R000-S025	2038	FL.R	P00021	T001	250	Lucifer Yellow	0
P00021-T001-R000-S025	2039	FL.R	P00021	T001	250	Lucifer Yellow	0
P00021-T001-R000-S025	2040	FL.R	P00021	T001	250	Lucifer Yellow	0
P00021-T001-R000-S041	2041	FL.R	P00021	T001	200	Lucifer Yellow	0
P00021-T001-R000-S041	2042	FL.R	P00021	T001	200	Lucifer Yellow	0
P00021-T001-R000-S041	2043	FL.R	P00021	T001	200	Lucifer Yellow	0
P00021-T001-R000-S041	2044	FL.R	P00021	T001	200	Lucifer Yellow	0
P00021-T001-R000-S041	2045	FL.R	P00021	T001	200	Lucifer Yellow	0
P00021-T001-R000-S041	2046	FL.R	P00021	T001	200	Lucifer Yellow	0
P00021-T001-R000-S041	2047	FL.R	P00021	T001	200	Lucifer Yellow	0
P00021-T001-R000-S041	2048	FL.R	P00021	T001	200	Lucifer Yellow	0
P00021-T001-R000-S041	2049	FL.R	P00021	T001	200	Lucifer Yellow	0
P00021-T001-R000-S041	2050	FL.R	P00021	T001	200	Lucifer Yellow	0
P00021-T001-R000-S031	2051	FL.R	P00021	T001	200	Lucifer Yellow	0
P00021-T001-R000-S031	2052	FL.R	P00021	T001	200	Lucifer Yellow	0
P00021-T001-R000-S031	2053	FL.R	P00021	T001	200	Lucifer Yellow	0
P00021-T001-R000-S031	2054	FL.R	P00021	T001	200	Lucifer Yellow	0
P00021-T001-R000-S031	2055	FL.R	P00021	T001	200	Lucifer Yellow	0
P00021-T001-R000-S031	2056	FL.R	P00021	T001	200	Lucifer Yellow	0
P00021-T001-R000-S031	2057	FL.R	P00021	T001	200	Lucifer Yellow	0
P00021-T001-R000-S031	2058	FL.R	P00021	T001	200	Lucifer Yellow	0
P00021-T001-R000-S031	2059	FL.R	P00021	T001	200	Lucifer Yellow	0
P00021-T001-R000-S031	2060	FL.R	P00021	T001	200	Lucifer Yellow	0
P00021-T001-R000-S031	2061	FL.R	P00021	T001	200	Lucifer Yellow	0
P00021-T001-R000-S031	2062	FL.R	P00021	T001	200	Lucifer Yellow	0
P00021-T001-R000-S031	2063	FL.R	P00021	T001	200	Lucifer Yellow	0
P00021-T001-R000-S031	2064	FL.R	P00021	T001	200	Lucifer Yellow	0
P00021-T001-R000-S031	2065	FL.R	P00021	T001	200	Lucifer Yellow	0
P00021-T001-R000-S031	2066	FL.R	P00021	T001	200	Lucifer Yellow	0
P00021-T001-R000-S031	2067	FL.R	P00021	T001	200	Lucifer Yellow	0
P00021-T001-R000-S031	2068	FL.R	P00021	T001	200	Lucifer Yellow	0
P00021-T001-R000-S031	2069	FL.R	P00021	T001	200	Lucifer Yellow	0
P00021-T001-R000-S031	2070	FL.R	P00021	T001	200	Lucifer Yellow	0
P00021-T001-R000-S031	2071	FL.R	P00021	T001	200	Lucifer Yellow	0
P00021-T001-R000-S031	2072	FL.R	P00021	T001	200	Lucifer Yellow	0
P00021-T001-R000-S031	2073	FL.R	P00021	T001	200	Lucifer Yellow	0
P00021-T001-R000-S031	2075	FL.R	P00021	T001	200	Lucifer Yellow	0
P00021-T001-R000-S031	2076	FL.R	P00021	T001	200	Lucifer Yellow	0
P00021-T001-R000-S031	2077	FL.R	P00021	T001	200	Lucifer Yellow	0
P00021-T001-R000-S039	2078	FL.R	P00021	T001	200	Lucifer Yellow	0
P00021-T001-R000-S039	2079	FL.R	P00021	T001	200	Lucifer Yellow	0
P00021-T001-R000-S039	2080	FL.R	P00021	T001	200	Lucifer Yellow	0
P00021-T001-R000-S039	2081	FL.R	P00021	T001	200	Lucifer Yellow	0
P00021-T001-R000-S039	2082	FL.R	P00021	T001	200	Lucifer Yellow	0
P00021-T001-R000-S039	2083	FL.R	P00021	T001	200	Lucifer Yellow	0
P00021-T001-R000-S039	2084	FL.R	P00021	T001	200	Lucifer Yellow	0
P00021-T001-R000-S039	2085	FL.R	P00021	T001	200	Lucifer Yellow	0
P00021-T001-R000-S039	2086	FL.R	P00021	T001	200	Lucifer Yellow	0
P00021-T001-R000-S039	2087	FL.R	P00021	T001	200	Lucifer Yellow	0
P00021-T001-R000-S039	2088	FL.R	P00021	T001	200	Lucifer Yellow	0
P00021-T001-R000-S039	2089	FL.R	P00021	T001	200	Lucifer Yellow	0
P00021-T001-R000-S039	2090	FL.R	P00021	T001	200	Lucifer Yellow	0
P00021-T001-R000-S039	2091	FL.R	P00021	T001	200	Lucifer Yellow	0
P00021-T001-R000-S039	2092	FL.R	P00021	T001	200	Lucifer Yellow	0
P00021-T001-R000-S039	2093	FL.R	P00021	T001	200	Lucifer Yellow	0
P00021-T001-R000-S039	2094	FL.R	P00021	T001	200	Lucifer Yellow	0
P00021-T001-R000-S039	2095	FL.R	P00021	T001	200	Lucifer Yellow	0
P00021-T001-R000-S039	2096	FL.R	P00021	T001	200	Lucifer Yellow	0
P00021-T001-R000-S039	2097	FL.R	P00021	T001	200	Lucifer Yellow	0
P00021-T001-R000-S039	2098	FL.R	P00021	T001	200	Lucifer Yellow	0
P00021-T001-R000-S039	2099	FL.R	P00021	T001	200	Lucifer Yellow	0
P00021-T001-R000-S039	2100	FL.R	P00021	T001	200	Lucifer Yellow	0
P00021-T001-R000-S039	2101	FL.R	P00021	T001	200	Lucifer Yellow	0
P00021-T001-R000-S039	2102	FL.R	P00021	T001	200	Lucifer Yellow	0
P00021-T001-R000-S039	2103	FL.R	P00021	T001	200	Lucifer Yellow	0
P00021-T001-R000-S039	2104	FL.R	P00021	T001	200	Lucifer Yellow	0
P00021-T001-R000-S039	2105	FL.R	P00021	T001	200	Lucifer Yellow	0
P00021-T001-R000-S039	2106	FL.R	P00021	T001	200	Lucifer Yellow	0
P00021-T001-R000-S039	2107	FL.R	P00021	T001	200	Lucifer Yellow	0
P00021-T001-R000-S039	2108	FL.R	P00021	T001	200	Lucifer Yellow	0
P00021-T001-R000-S024	2110	FL.R	P00021	T001	250	Lucifer Yellow	0
P00021-T001-R000-S024	2111	FL.R	P00021	T001	250	Lucifer Yellow	0
P00021-T001-R000-S024	2112	FL.R	P00021	T001	250	Lucifer Yellow	0
P00021-T001-R000-S024	2113	FL.R	P00021	T001	250	Lucifer Yellow	0
P00021-T001-R000-S024	2114	FL.R	P00021	T001	250	Lucifer Yellow	0
P00021-T001-R000-S024	2115	FL.R	P00021	T001	250	Lucifer Yellow	0
P00021-T001-R000-S024	2116	FL.R	P00021	T001	250	Lucifer Yellow	0
P00021-T001-R000-S024	2117	FL.R	P00021	T001	250	Lucifer Yellow	0
P00021-T001-R000-S024	2118	FL.R	P00021	T001	250	Lucifer Yellow	0
P00021-T001-R000-S024	2119	FL.R	P00021	T001	250	Lucifer Yellow	0
P00021-T001-R000-S024	2120	FL.R	P00021	T001	250	Lucifer Yellow	0
P00021-T001-R000-S024	2121	FL.R	P00021	T001	250	Lucifer Yellow	0
P00021-T001-R000-S024	2122	FL.R	P00021	T001	250	Lucifer Yellow	0
P00021-T001-R000-S024	2123	FL.R	P00021	T001	250	Lucifer Yellow	0
P00021-T001-R000-S024	2124	FL.R	P00021	T001	250	Lucifer Yellow	0
P00021-T001-R000-S024	2125	FL.R	P00021	T001	250	Lucifer Yellow	0
P00021-T001-R000-S024	2126	FL.R	P00021	T001	250	Lucifer Yellow	0
P00021-T001-R000-S024	2127	FL.R	P00021	T001	250	Lucifer Yellow	0
P00021-T001-R000-S024	2128	FL.R	P00021	T001	250	Lucifer Yellow	0
P00021-T001-R000-S024	2129	FL.R	P00021	T001	250	Lucifer Yellow	0
P00021-T001-R000-S024	2130	FL.R	P00021	T001	250	Lucifer Yellow	0
P00021-T001-R000-S024	2131	FL.R	P00021	T001	250	Lucifer Yellow	0
P00021-T001-R000-S024	2132	FL.R	P00021	T001	250	Lucifer Yellow	0
P00021-T001-R000-S024	2133	FL.R	P00021	T001	250	Lucifer Yellow	0
P00021-T001-R000-S024	2134	FL.R	P00021	T001	250	Lucifer Yellow	0
P00021-T001-R000-S041	2135	FL.R	P00021	T001	200	Lucifer Yellow	0
P00021-T001-R000-S041	2136	FL.R	P00021	T001	200	Lucifer Yellow	0
P00021-T001-R000-S041	2137	FL.R	P00021	T001	200	Lucifer Yellow	0
P00021-T001-R000-S041	2138	FL.R	P00021	T001	200	Lucifer Yellow	0
P00021-T001-R000-S041	2139	FL.R	P00021	T001	200	Lucifer Yellow	0
P00021-T001-R000-S041	2140	FL.R	P00021	T001	200	Lucifer Yellow	0
P00021-T001-R000-S041	2141	FL.R	P00021	T001	200	Lucifer Yellow	0
P00021-T001-R000-S041	2142	FL.R	P00021	T001	200	Lucifer Yellow	0
P00021-T001-R000-S041	2143	FL.R	P00021	T001	200	Lucifer Yellow	0
P00021-T001-R000-S041	2144	FL.R	P00021	T001	200	Lucifer Yellow	0
P00021-T001-R000-S041	2145	FL.R	P00021	T001	200	Lucifer Yellow	0
P00021-T001-R000-S041	2146	FL.R	P00021	T001	200	Lucifer Yellow	0
P00021-T001-R000-S041	2147	FL.R	P00021	T001	200	Lucifer Yellow	0
P00021-T001-R000-S041	2148	FL.R	P00021	T001	200	Lucifer Yellow	0
P00021-T001-R000-S041	2149	FL.R	P00021	T001	200	Lucifer Yellow	0
P00021-T001-R000-S041	2151	FL.R	P00021	T001	200	Lucifer Yellow	0
P00021-T001-R000-S041	2152	FL.R	P00021	T001	200	Lucifer Yellow	0
P00021-T001-R000-S041	2153	FL.R	P00021	T001	200	Lucifer Yellow	0
P00021-T001-R000-S041	2154	FL.R	P00021	T001	200	Lucifer Yellow	0
P00021-T001-R000-S041	2155	FL.R	P00021	T001	200	Lucifer Yellow	0
P00021-T001-R000-S026	2157	FL.R	P00021	T001	200	Lucifer Yellow	0
P00021-T001-R000-S026	2158	FL.R	P00021	T001	200	Lucifer Yellow	0
P00021-T001-R000-S026	2160	FL.R	P00021	T001	200	Lucifer Yellow	0
P00021-T001-R000-S026	2162	FL.R	P00021	T001	200	Lucifer Yellow	0
P00021-T001-R000-S026	2163	FL.R	P00021	T001	200	Lucifer Yellow	0
P00021-T001-R000-S026	2164	FL.R	P00021	T001	200	Lucifer Yellow	0
P00021-T001-R000-S026	2165	FL.R	P00021	T001	200	Lucifer Yellow	0
P00021-T001-R000-S026	2166	FL.R	P00021	T001	200	Lucifer Yellow	0
P00021-T001-R000-S026	2167	FL.R	P00021	T001	200	Lucifer Yellow	0
P00021-T001-R000-S026	2168	FL.R	P00021	T001	200	Lucifer Yellow	0
P00021-T001-R000-S038	2169	FL.R	P00021	T001	200	Lucifer Yellow	0
P00021-T001-R000-S038	2170	FL.R	P00021	T001	200	Lucifer Yellow	0
P00021-T001-R000-S038	2171	FL.R	P00021	T001	200	Lucifer Yellow	0
P00021-T001-R000-S038	2172	FL.R	P00021	T001	200	Lucifer Yellow	0
P00021-T001-R000-S038	2173	FL.R	P00021	T001	200	Lucifer Yellow	0
P00021-T001-R000-S038	2174	FL.R	P00021	T001	200	Lucifer Yellow	0
P00023-T001-R000-S001	2175	M(I)FG.L	P00023	T001	250	Lucifer Yellow	0
P00023-T001-R000-S001	2176	M(I)FG.L	P00023	T001	250	Lucifer Yellow	0
P00023-T001-R000-S001	2177	M(I)FG.L	P00023	T001	250	Lucifer Yellow	0
P00023-T001-R000-S001	2178	M(I)FG.L	P00023	T001	250	Lucifer Yellow	0
P00023-T001-R000-S001	2179	M(I)FG.L	P00023	T001	250	Lucifer Yellow	0
P00023-T001-R000-S001	2181	M(I)FG.L	P00023	T001	250	Lucifer Yellow	0
P00023-T001-R000-S001	2183	M(I)FG.L	P00023	T001	250	Lucifer Yellow	0
P00023-T001-R000-S008	2184	M(I)FG.L	P00023	T001	250	Lucifer Yellow	0
P00023-T001-R000-S008	2185	M(I)FG.L	P00023	T001	250	Lucifer Yellow	0
P00023-T001-R000-S008	2186	M(I)FG.L	P00023	T001	250	Lucifer Yellow	0
P00023-T001-R000-S008	2188	M(I)FG.L	P00023	T001	250	Lucifer Yellow	0
P00023-T001-R000-S008	2189	M(I)FG.L	P00023	T001	250	Lucifer Yellow	0
P00023-T001-R000-S008	2190	M(I)FG.L	P00023	T001	250	Lucifer Yellow	0
P00023-T001-R000-S008	2191	M(I)FG.L	P00023	T001	250	Lucifer Yellow	0
P00023-T001-R000-S008	2192	M(I)FG.L	P00023	T001	250	Lucifer Yellow	0
P00023-T001-R000-S008	2193	M(I)FG.L	P00023	T001	250	Lucifer Yellow	0
P00023-T001-R000-S008	2194	M(I)FG.L	P00023	T001	250	Lucifer Yellow	0
P00023-T001-R000-S008	2195	M(I)FG.L	P00023	T001	250	Lucifer Yellow	0
P00023-T001-R000-S008	2196	M(I)FG.L	P00023	T001	250	Lucifer Yellow	0
P00023-T001-R000-S008	2197	M(I)FG.L	P00023	T001	250	Lucifer Yellow	0
P00021-T001-R000-S033	2198	FL.R	P00021	T001	200	Lucifer Yellow	0
P00021-T001-R000-S033	2199	FL.R	P00021	T001	200	Lucifer Yellow	0
P00021-T001-R000-S033	2200	FL.R	P00021	T001	200	Lucifer Yellow	0
P00021-T001-R000-S033	2201	FL.R	P00021	T001	200	Lucifer Yellow	0
P00021-T001-R000-S033	2202	FL.R	P00021	T001	200	Lucifer Yellow	0
P00021-T001-R000-S033	2203	FL.R	P00021	T001	200	Lucifer Yellow	0
P00021-T001-R000-S033	2204	FL.R	P00021	T001	200	Lucifer Yellow	0
P00021-T001-R000-S033	2205	FL.R	P00021	T001	200	Lucifer Yellow	0
P00021-T001-R000-S033	2206	FL.R	P00021	T001	200	Lucifer Yellow	0
P00021-T001-R000-S033	2208	FL.R	P00021	T001	200	Lucifer Yellow	0
P00021-T001-R000-S033	2209	FL.R	P00021	T001	200	Lucifer Yellow	0
P00021-T001-R000-S033	2210	FL.R	P00021	T001	200	Lucifer Yellow	0
P00021-T001-R000-S033	2211	FL.R	P00021	T001	200	Lucifer Yellow	0
P00023-T001-R000-S012	2212	M(I)FG.L	P00023	T001	250	Lucifer Yellow	0
P00023-T001-R000-S012	2213	M(I)FG.L	P00023	T001	250	Lucifer Yellow	0
P00023-T001-R000-S012	2215	M(I)FG.L	P00023	T001	250	Lucifer Yellow	0
P00023-T001-R000-S012	2216	M(I)FG.L	P00023	T001	250	Lucifer Yellow	0
P00023-T001-R000-S012	2217	M(I)FG.L	P00023	T001	250	Lucifer Yellow	0
P00023-T001-R000-S012	2218	M(I)FG.L	P00023	T001	250	Lucifer Yellow	0
P00021-T001-R000-S037	2219	FL.R	P00021	T001	200	Lucifer Yellow	0
P00021-T001-R000-S037	2220	FL.R	P00021	T001	200	Lucifer Yellow	0
P00021-T001-R000-S037	2221	FL.R	P00021	T001	200	Lucifer Yellow	0
P00021-T001-R000-S037	2222	FL.R	P00021	T001	200	Lucifer Yellow	0
P00021-T001-R000-S037	2223	FL.R	P00021	T001	200	Lucifer Yellow	0
P00021-T001-R000-S037	2224	FL.R	P00021	T001	200	Lucifer Yellow	0
P00021-T001-R000-S037	2225	FL.R	P00021	T001	200	Lucifer Yellow	0
P00021-T001-R000-S037	2226	FL.R	P00021	T001	200	Lucifer Yellow	0
P00021-T001-R000-S037	2227	FL.R	P00021	T001	200	Lucifer Yellow	0
P00021-T001-R000-S037	2228	FL.R	P00021	T001	200	Lucifer Yellow	0
P00021-T001-R000-S037	2229	FL.R	P00021	T001	200	Lucifer Yellow	0
P00021-T001-R000-S037	2230	FL.R	P00021	T001	200	Lucifer Yellow	0
P00021-T001-R000-S037	2231	FL.R	P00021	T001	200	Lucifer Yellow	0
P00021-T001-R000-S037	2232	FL.R	P00021	T001	200	Lucifer Yellow	0
P00021-T001-R000-S037	2233	FL.R	P00021	T001	200	Lucifer Yellow	0
P00021-T001-R000-S026	2234	FL.R	P00021	T001	200	Lucifer Yellow	0
P00021-T001-R000-S026	2235	FL.R	P00021	T001	200	Lucifer Yellow	0
P00021-T001-R000-S026	2236	FL.R	P00021	T001	200	Lucifer Yellow	0
P00021-T001-R000-S028	2237	FL.R	P00021	T001	300	Lucifer Yellow	0
P00021-T001-R000-S028	2238	FL.R	P00021	T001	300	Lucifer Yellow	0
P00021-T001-R000-S028	2239	FL.R	P00021	T001	300	Lucifer Yellow	0
P00021-T001-R000-S028	2240	FL.R	P00021	T001	300	Lucifer Yellow	0
P00021-T001-R000-S028	2241	FL.R	P00021	T001	300	Lucifer Yellow	0
P00021-T001-R000-S028	2242	FL.R	P00021	T001	300	Lucifer Yellow	0
P00021-T001-R000-S028	2243	FL.R	P00021	T001	300	Lucifer Yellow	0
P00021-T001-R000-S028	2244	FL.R	P00021	T001	300	Lucifer Yellow	0
P00021-T001-R000-S028	2245	FL.R	P00021	T001	300	Lucifer Yellow	0
P00021-T001-R000-S028	2246	FL.R	P00021	T001	300	Lucifer Yellow	0
P00021-T001-R000-S028	2247	FL.R	P00021	T001	300	Lucifer Yellow	0
P00021-T001-R000-S028	2248	FL.R	P00021	T001	300	Lucifer Yellow	0
P00021-T001-R000-S028	2249	FL.R	P00021	T001	300	Lucifer Yellow	0
P00021-T001-R000-S028	2250	FL.R	P00021	T001	300	Lucifer Yellow	0
P00021-T001-R000-S028	2251	FL.R	P00021	T001	300	Lucifer Yellow	0
P00021-T001-R000-S028	2252	FL.R	P00021	T001	300	Lucifer Yellow	0
P00021-T001-R000-S028	2253	FL.R	P00021	T001	300	Lucifer Yellow	0
P00021-T001-R000-S028	2254	FL.R	P00021	T001	300	Lucifer Yellow	0
P00021-T001-R000-S028	2255	FL.R	P00021	T001	300	Lucifer Yellow	0
P00021-T001-R000-S028	2256	FL.R	P00021	T001	300	Lucifer Yellow	0
P00021-T001-R000-S035	2257	FL.R	P00021	T001	200	Lucifer Yellow	0
P00021-T001-R000-S035	2258	FL.R	P00021	T001	200	Lucifer Yellow	0
P00021-T001-R000-S035	2259	FL.R	P00021	T001	200	Lucifer Yellow	0
P00021-T001-R000-S036	2260	FL.R	P00021	T001	200	Lucifer Yellow	0
P00021-T001-R000-S036	2261	FL.R	P00021	T001	200	Lucifer Yellow	0
P00021-T001-R000-S036	2262	FL.R	P00021	T001	200	Lucifer Yellow	0
P00021-T001-R000-S036	2263	FL.R	P00021	T001	200	Lucifer Yellow	0
P00021-T001-R000-S036	2264	FL.R	P00021	T001	200	Lucifer Yellow	0
P00021-T001-R000-S036	2265	FL.R	P00021	T001	200	Lucifer Yellow	0
P00021-T001-R000-S036	2266	FL.R	P00021	T001	200	Lucifer Yellow	0
P00021-T001-R000-S036	2267	FL.R	P00021	T001	200	Lucifer Yellow	0
P00021-T001-R000-S036	2268	FL.R	P00021	T001	200	Lucifer Yellow	0
P00021-T001-R000-S036	2269	FL.R	P00021	T001	200	Lucifer Yellow	0
P00021-T001-R000-S033	2270	FL.R	P00021	T001	200	Lucifer Yellow	0
P00021-T001-R000-S033	2271	FL.R	P00021	T001	200	Lucifer Yellow	0
P00021-T001-R000-S033	2272	FL.R	P00021	T001	200	Lucifer Yellow	0
P00021-T001-R000-S033	2273	FL.R	P00021	T001	200	Lucifer Yellow	0
P00021-T001-R000-S033	2274	FL.R	P00021	T001	200	Lucifer Yellow	0
P00021-T001-R000-S033	2275	FL.R	P00021	T001	200	Lucifer Yellow	0
P00021-T001-R000-S033	2277	FL.R	P00021	T001	200	Lucifer Yellow	0
P00023-T001-R000-S008	2278	M(I)FG.L	P00023	T001	250	Lucifer Yellow	0
P00023-T001-R000-S008	2279	M(I)FG.L	P00023	T001	250	Lucifer Yellow	0
P00023-T001-R000-S008	2280	M(I)FG.L	P00023	T001	250	Lucifer Yellow	0
P00023-T001-R000-S008	2281	M(I)FG.L	P00023	T001	250	Lucifer Yellow	0
P00023-T001-R000-S008	2283	M(I)FG.L	P00023	T001	250	Lucifer Yellow	0
P00023-T001-R000-S008	2284	M(I)FG.L	P00023	T001	250	Lucifer Yellow	0
P00023-T001-R000-S008	2285	M(I)FG.L	P00023	T001	250	Lucifer Yellow	0
P00023-T001-R000-S008	2286	M(I)FG.L	P00023	T001	250	Lucifer Yellow	0
P00021-T001-R000-S033	2287	FL.R	P00021	T001	200	Lucifer Yellow	0
P00021-T001-R000-S033	2288	FL.R	P00021	T001	200	Lucifer Yellow	0
P00021-T001-R000-S033	2289	FL.R	P00021	T001	200	Lucifer Yellow	0
P00021-T001-R000-S033	2290	FL.R	P00021	T001	200	Lucifer Yellow	0
P00021-T001-R000-S033	2291	FL.R	P00021	T001	200	Lucifer Yellow	0
P00021-T001-R000-S033	2292	FL.R	P00021	T001	200	Lucifer Yellow	0
P00021-T001-R000-S033	2293	FL.R	P00021	T001	200	Lucifer Yellow	0
P00021-T001-R000-S033	2294	FL.R	P00021	T001	200	Lucifer Yellow	0
P00021-T001-R000-S033	2295	FL.R	P00021	T001	200	Lucifer Yellow	0
P00021-T001-R000-S033	2296	FL.R	P00021	T001	200	Lucifer Yellow	0
P00021-T001-R000-S033	2297	FL.R	P00021	T001	200	Lucifer Yellow	0
P00021-T001-R000-S032	2298	FL.R	P00021	T001	200	Lucifer Yellow	0
P00021-T001-R000-S032	2299	FL.R	P00021	T001	200	Lucifer Yellow	0
[truncated: 6,399 more rows]
